1        **Towards personalized auditory models: predicting individual sensorineural-**  
2 **hearing-loss profiles from recorded human auditory physiology**

3

4        **Sarineh Keshishzadeh\***

5 Hearing Technology @ WAVES, Department of Information Technology, Ghent University  
6 Technologiepark 126, Zwijnaarde 9052, Belgium

7 \*corresponding author: [sarineh.keshishzadeh@ugent.be](mailto:sarineh.keshishzadeh@ugent.be)

8

9        **Markus Garrett**

10 Medizinische Physik and Cluster of Excellence Hearing4all, Department of Medical Physics and  
11 Acoustics, University of Oldenburg

12 Carl-von-Ossietzky strasse 9-11, 26120 Oldenburg, Germany

13 Email: [markus.garrett@uni-oldenburg.de](mailto:markus.garrett@uni-oldenburg.de)

14

15        **Sarah Verhulst**

16 Hearing Technology @ WAVES, Department of Information Technology, Ghent University  
17 Technologiepark 126, Zwijnaarde 9052, Belgium

18 Email: [s.verhulst@ugent.be](mailto:s.verhulst@ugent.be)

19

## 20 **Abstract**

21 Over the past decades, different types of auditory models have been developed to study the function-  
22 ing of normal and impaired auditory processing. Several models can simulate frequency-dependent  
23 sensorineural hearing loss (SNHL), and can in this way be used to develop personalized audio-signal  
24 processing for hearing aids. However, to determine individualized SNHL profiles, we rely on indirect  
25 and non-invasive markers of cochlear and auditory-nerve (AN) damage. Our progressive knowledge  
26 of the functional aspects of different SNHL subtypes stresses the importance of incorporating them  
27 into the simulated SNHL profile, but has at the same time complicated the task of accomplishing  
28 this on the basis of non-invasive markers. In particular, different auditory evoked potential (AEP)  
29 types can show a different sensitivity to outer-hair-cell (OHC), inner-hair-cell (IHC) or AN dam-  
30 age, but it is not clear which AEP-derived metric is best suited to develop personalized auditory  
31 models. This study investigates how simulated and recorded AEPs can be used to derive individual  
32 AN- or OHC-damage patterns and personalize auditory processing models. First, we individualized  
33 the cochlear-model parameters using common methods of frequency-specific OHC-damage quantifi-  
34 cation, after which we simulated AEPs for different degrees of AN-damage. Using a classification  
35 technique, we determined the recorded AEP metric that best predicted the simulated individualized  
36 CS profiles. We cross-validated our method using the dataset at hand, but also applied the trained  
37 classifier to recorded AEPs from a new cohort to illustrate the generalisability of the method.

## 38 **Keywords**

39 individualized hearing-loss profile; envelope following response; cochlear synaptopathy; sensorineu-  
40 ral hearing-loss; auditory modelling; electrophysiology; auditory evoked potentials

## 41 Introduction

42 Auditory Evoked Potentials (AEPs) are widely adopted as markers of sensorineural hearing loss  
43 (SNHL) in clinical and research settings. In research animals, auditory brainstem response (ABR)  
44 or envelope-following response (EFR) amplitudes can be used to quantify auditory-nerve (AN)  
45 fiber damage, i.e. cochlear synaptopathy (CS), (Kujawa and Liberman, 2009; Furman et al., 2013;  
46 Sergeyenko et al., 2013; Shaheen et al., 2015). However, applying the same AEP markers for CS  
47 diagnosis in humans has yielded mixed success, since AEP amplitudes can be affected by (i) other  
48 coexisting SNHL aspects such as outer-hair-cell (OHC) damage (Don and Eggermont, 1978; Gorga  
49 et al., 1985; Herdman and Stapells, 2003; Verhulst et al., 2016; Chen et al., 2008; Garrett and  
50 Verhulst, 2019; Keshishzadeh et al., 2020) and (ii) subject-specific factors such as age, gender, and  
51 head-size (Trune et al., 1988; Mitchell et al., 1989; Hickox et al., 2017). Moreover, the sensitivity  
52 of AEPs to different degrees of OHC-loss and CS is unclear, and a direct quantification of AN  
53 fiber damage through histopathology is impossible in live humans (Bharadwaj et al., 2014). These  
54 problems hinder the study of the specific impact of OHC-damage and CS on recorded AEPs, and  
55 render an AEP-based quantification of AN fiber damage difficult in listeners with mixed hearing  
56 pathologies. However, this last step is crucial when developing personalized models of auditory  
57 processing for use within numerical closed-loop hearing restoration systems.

58 Even though several auditory models incorporate sources of SNHL (e.g., Ewert and Dau 2000; Heinz  
59 et al. 2001; Rohdenburg et al. 2005; Zilany and Bruce 2006; Jepsen et al. 2008; Jepsen and Dau  
60 2011; Ewert et al. 2013; Verhulst et al. 2018), methods to individualize the AN-damage pattern on  
61 the basis of recorded AEP metrics are non-existent. Here, we investigate the potential of common  
62 AEP markers to individualize the frequency-specific AN damage profile of personalized auditory  
63 models with or without other co-occurring aspects of SNHL. Specifically, we present a combined  
64 experimental-modeling method in which (i) individual cochlear-gain-loss (CGL) parameters are

65 extracted from either the audiogram or distortion-product otoacoustic emissions (DPOAEs), and  
66 (ii) a feature set of recorded AEP metrics is compared to simulated AEP metrics to derive periphery  
67 models with different CS profiles. Using a classifier that was trained on simulated AEPs for different  
68 SNHL profiles, we selected the individual AN profile, that best explained the recorded AEP features  
69 from a test subject. We tested this method on 35 participants, which were separated into groups  
70 of young normal-hearing (yNH), older normal-hearing (oNH) and older hearing-impaired (oHI)  
71 listeners (Garrett et al., 2020). Validation of our method to predict individual AN-damage profile  
72 from recorded AEPs was performed on data from a new cohort.

73 Before we describe the classification method in detail, we summarize which AEP markers are  
74 promising to include. Among the hitherto proposed AEP-derived metrics of AN damage, the ABR  
75 wave-I is known to degrade as a consequence of CS in subjects with intact sensory hair cells (Kujawa  
76 and Liberman, 2009; Parthasarathy and Kujawa, 2018), however this metric is highly variable in  
77 humans (Stamper and Johnson, 2015; Plack et al., 2016) when the contribution of between-subject  
78 variability sources such as head-size or tissue resistance are not considered (Prendergast et al., 2018).  
79 Even though we can assume that any hearing deficit reflecting on the ABR wave-I would travel  
80 through the auditory pathway to reflect on the ABR wave-V as well, homeostatic gain changes  
81 between AN fibers and inferior colliculus (IC) may affect the wave-V amplitude (Schaette and  
82 McAlpine, 2011; Chambers et al., 2016; Möhrle et al., 2016; Henry and Abrams, 2018) and hence  
83 its diagnostic power for CS diagnosis. Another AEP marker, the EFR amplitude, which reflects the  
84 strength of a phase-locked AEP response to an amplitude-modulated (AM) stimulus, was shown to  
85 degrade as a consequence of CS in mice histological studies (Shaheen et al., 2015; Parthasarathy and  
86 Kujawa, 2018) and as a consequence of age in human listeners (Goossens et al., 2016; Vasilkov et al.,  
87 2020). EFRs offer a more robust measure of the AN fiber population than the ABR wave-I, when  
88 recorded in the same animals (Shaheen et al., 2015; Plack et al., 2016; Parthasarathy and Kujawa,  
89 2018). However, similar to the ABR wave-V, EFR generators have latencies associated with IC

90 processing (Purcell et al., 2004), thus differences in central auditory processing may reflect on the  
91 EFR magnitude to mask individual synaptopathy differences (Chambers et al., 2016; Möhrle et al.,  
92 2016; Parthasarathy et al., 2019a,b). To address these issues, relative EFR and ABR metrics were  
93 proposed in several studies to cancel out subject-specific factors and isolate the CS component  
94 of SNHL in listeners with coexisting OHC-loss: ABR wave-I amplitude growth as a function of  
95 stimulus intensity (Furman et al., 2013), ABR wave-I - V latency difference (Coats and Martin,  
96 1977; Elberling and Parbo, 1987; Watson, 1996), the wave-V and I amplitude ratio (Gu et al., 2012;  
97 Schaette and McAlpine, 2011; Hickox and Liberman, 2014), EFR amplitude slope as a function of  
98 modulation depth (Bharadwaj and Shinn-Cunningham, 2014; Guest et al., 2018), the derived-band  
99 EFR (Keshishzadeh et al., 2020), or the combined use of the ABR wave-V and EFR (Vasilkov and  
100 Verhulst, 2019). While these relative metrics are promising, it is not known how OHC-loss and  
101 CS differentially impact AEPs. Recent modelling approaches have shown promise to design EFR  
102 stimuli which are maximally sensitive to CS in the presence of OHC damage (Vasilkov et al., 2020),  
103 but conclusive histopathological evidence is to date not available. To make use of the listed metrics  
104 to build personalized hearing profiles for a broad population with various SNHL etiologies, two  
105 requirements need to be fulfilled. We need to (i) use AEP markers that are maximally sensitive  
106 to the CS aspect of SNHL and (ii) combine them with a sensitive marker of OHC deficits to  
107 individualize the OHC and CS aspects of SNHL. We thus considered various AEP markers (a  
108 total of 13) encompassing spectral magnitudes, time-domain peaks, latencies and relative metrics,  
109 and combinations thereof, to identify which markers best predict the simulated individualized CS  
110 profiles and can be used for reliable auditory profiling.

## 111 **Experimental Design**

112 ABR, EFR and OHC-damage markers were derived from recordings of two experimental setups  
113 in different locations. These recordings were used for development and validation of the proposed  
114 method, respectively.

## 115 **Participants**

116 The dataset that was used to develop the auditory profiling method included recordings from  
117 a total of 43 subjects. They were recruited into three groups: 15 young normal-hearing (yNH:  
118  $24.53 \pm 2.26$  years, 8 female), 16 older normal-hearing (oNH:  $64.25 \pm 1.88$  years, 8 female) and 12  
119 older hearing-impaired (oHI:  $65.33 \pm 1.87$  years, 7 female) groups. Two oNH subjects were omitted  
120 from our study due to non-identifiable ABR waveforms. The hearing thresholds of the participants  
121 were assessed at 12 standard audiometric frequencies between 0.125 and 10 kHz (Auritec AT900,  
122 Hamburg, Germany audiometer). AEP stimuli were presented monaurally to the ear with the best  
123 4 kHz threshold. Audiometric thresholds were below 20 dB-HL at all measured frequencies in the  
124 yNH group and below 25 dB-HL for frequencies up to 4 kHz in the oNH group. The oHI listeners  
125 had sloping high-frequency audiograms with 4-kHz thresholds above 25 dB-HL (Fig. 1a). The AEP  
126 recordings were conducted in an electrically and acoustically shielded booth, while subjects were  
127 sitting in a comfortable chair and watching silent movies.

128 The second experiment, which was used to validate our method on a new cohort, had 19 yNH  
129 subjects, aged between 18 and 25 years ( $21.6 \pm 2.27$  years, 12 female). Volunteers with a history  
130 of hearing pathology or ear surgery were excluded based on a recruitment questionnaire. Audio-  
131 grams were measured in a double-wall sound-attenuating booth, using an Interacoustics Equinox  
132 Interacoustics audiometer. All participants had audiometric thresholds below 25 dB-HL within the  
133 measured frequency range, i.e. [0.125-10] kHz, and the best ear was determined on the basis of

134 their audiogram and tympanogram. The experiment protocol included AEP measurements with  
135 a maximum duration of 3 hours and we only considered one AEP metric for validation purposes  
136 in the present study. AEP recordings were conducted in a quiet room while subjects were seated  
137 in a comfortable chair and watching muted movies. To minimize the noise intrusion level, both  
138 ears were covered with earmuffs and all electrical devices other than the measurement equipment  
139 (Intelligent Hearing Systems) were turned off and unplugged.  
140 Participants of both experiments were informed about the experimental procedure according to the  
141 ethical guidelines at Oldenburg University (first experiment) or Ghent University Hospital (UZ-  
142 Gent, second experiment) and were paid for their participation. A written informed consent was  
143 obtained from all participants.

## 144 **Distortion Product Otoacoustic Emission (DPOAE)**

145 In the first experiment, DPOAEs were acquired and analyzed using a custom-made MATLAB  
146 software (Mauermann, 2013). Stimuli were delivered through ER-2 earphones coupled to the ER-  
147 10B+ microphone system (Etymotic Research) using a primary frequency sweeping procedure at  
148 a fixed  $f_2/f_1$  ratio of 1.2. The implemented DPOAE paradigm, continuously swept the primary  
149 frequencies with a rate of 2s/octave within a  $1/3$  octave range around the geometric mean of  
150  $f_2 \in \{0.8, 1, 2, 4\}$  kHz (Long et al., 2008). The  $L_2$  primary levels ranged between 30-60 dB-SPL for  
151 the yNH and oNH groups, using a 6-dB step. The level range was different for the oHI group: 30-72  
152 dB-SPL.  $L_1$  levels were determined according to the scissors paradigm (Kummer et al., 1998). For a  
153 given  $f_2$  primary frequency, the DP-component ( $L_{DP}$ ) growth function was plotted as a function of  
154  $L_2$  and a cubic curve was fit to the  $L_{DP}$  data-points using a bootstrapping procedure to include the  
155 standard deviation of the individual  $L_{DP}$  data-points in the fit (Verhulst et al., 2016). The  $L_2$  level  
156 at which the cubic curve crossed -25 dB-SPL was determined for each bootstrap average to yield

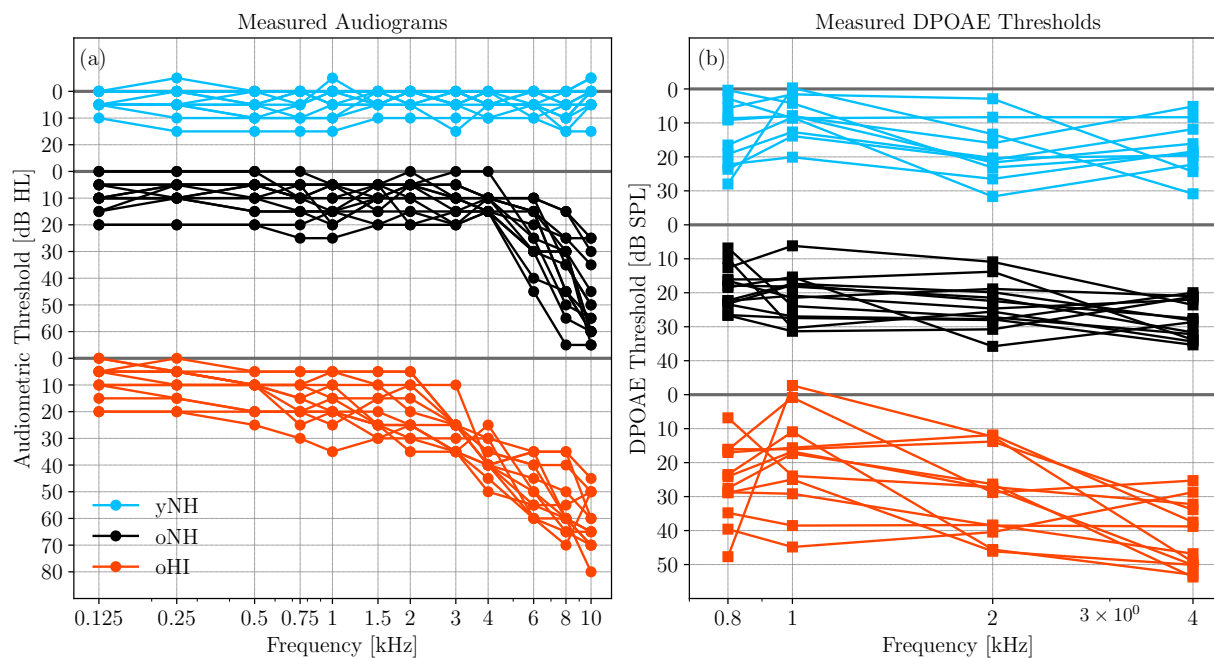

**Figure 1:** (a) Audiograms and (b) DPOAE thresholds (DPTHs) of the participants in the first experiment.

157 the DPOAE threshold (DPTH) and its standard deviation at a given  $f_2$  (Boege and Janssen, 2002).  
158 Derived experimental DPTHs of the yNH, oNH and oHI groups are shown in Fig 1b. DPOAEs  
159 were not available for the subjects of the validation experiment.

## 160 EEG Measurements

161 ABR and EFR stimuli were generated in MATLAB and digitized with a sampling rate of 48 kHz  
162 for the first dataset. Afterwards, they were delivered monaurally through a Fireface UCX external  
163 sound card (RME) and a TDT-HB7 headphone driver connected to a shielded ER-2 earphone.  
164 The electroencephalogram (EEG) signals were recorded with a sampling frequency of 16384 Hz  
165 via a 64-channel Biosemi EEG system using an equidistantly-spaced electrode cap. All active  
166 electrodes were placed in the cap using highly conductive gel. The common-mode-sense (CMS)



167 and driven-right-leg (DRL) electrodes were attached to the fronto-central midline and the tip of  
168 the nose, respectively. A comprehensive explanation of the experimental configuration can be found  
169 in Garrett and Verhulst (2019).

170 AEPs of the validation experiment were recorded using the SmartEP continuous acquisition module  
171 (SEPCAM) of the Universal Smart Box (Intelligent Hearing System, Miami, FL, United States).  
172 EFR stimuli were generated in MATLAB using a sampling rate of 20-kHz and stored in a “.wav”  
173 format. These files were loaded in SEPCAM and converted to the “.stm”, SEPCAM compatible  
174 format. AEP stimuli were presented monaurally through a shielded ER-2 earphone (Etymotic  
175 Research) and AEPs were recorded at a sampling frequency of 10 kHz via Ambu Neuroline 720  
176 snap electrodes connected to vertex, nasion and both earlobes. The electrodes were placed after a  
177 skin preparation procedure using NuPrep gel. The skin-electrode impedance was kept below 3 k $\Omega$   
178 during the recordings.

## 179 **EFR stimuli**

180 We recorded EFRs in response to a 400-ms-long stimuli consisting of a 4-kHz pure-tone carrier and  
181 a 120-Hz rectangular-wave modulator with 25% duty cycle (i.e. the RAM25 in Vasilkov et al. 2020).  
182 The stimulus waveform is visualized in the inset of Fig. 2b and we considered a modulation depth of  
183 95%. Stimuli were presented 1000 times (500 times in either positive or negative polarity) and had  
184 a root-mean-square (RMS) of 68.18 dB-SPL. The calibration of the stimulus was performed to have  
185 the same peak-to-peak amplitude as a 70-dB-SPL sinusoidal amplitude modulated (SAM) 4-kHz  
186 pure-tone. The Cz channel recording was re-referenced to the average of the ear-lobe electrodes and  
187 400-ms epochs were extracted relative to the stimulus onset. The mean-amplitude of each epoch  
188 was subtracted to correct for the baseline-drift. See Vasilkov et al. (2020) for further details on  
189 the frequency-domain bootstrapping and noise-floor estimation method. The noise-floor corrected  
190 spectral magnitudes ( $M_{f_k}$ ) at the modulation frequency  $f_1 = 120\text{Hz}$  and four harmonics, i.e.,  $f_2$  to

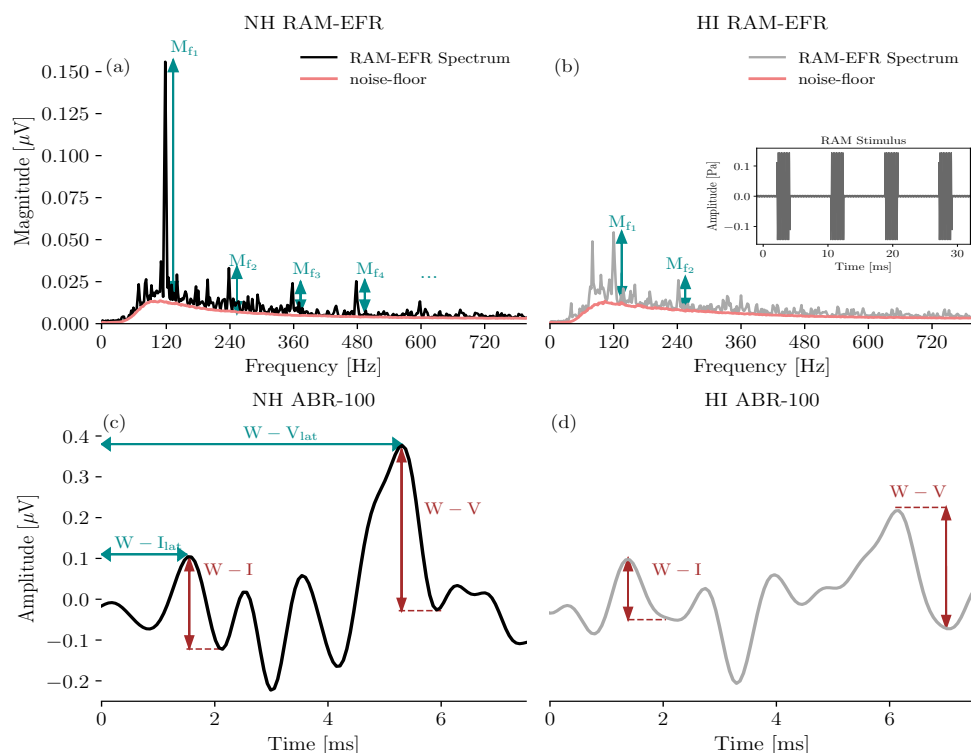

**Figure 2:** Comparison of exemplary NH and HI RAM-EFRs and ABRs. (a) RAM-EFR of a yNH subject (yNH15) and the corresponding noise-floor (NF). Arrows specified by  $M_f$ , show the peak-to-noise-floor magnitudes at the modulation frequency, i.e., 120 Hz, and the following harmonics. (b) RAM-EFR of an oHI subject (oHI) and the corresponding NF. (c) ABR of a yNH subject (yNH15). Arrows show the extracted wave-I and V amplitudes and latencies. (d) ABR of an oHI subject (oHI12).

191  $f_5$ , were summed up to yield the EFR.

$$\text{RAM-EFR} = \sum_{k=1}^5 M_{f_k}, \quad f_k = 120 \times (k) \quad (1)$$

192

193 Figure 2a depicts a typical NH RAM-EFR spectrum and corresponding noise-floor. The arrows  
 194 show the derived peak-to-noise-floor magnitudes at the modulation frequency and following har-  
 195 monics. The energy of EFR peak is reduced for the oHI subject shown in the panel (b).

196 The RAM-stimulus in the second experiment (i.e. the validation database) was a 110-Hz 95%  
197 modulated 4-kHz pure-tone. The 500-ms stimulus was presented 1000 times with alternating po-  
198 larity (500 each) and had a 70 dB-SPL level. The acquired AEPs were initially saved in “.EEG.F”  
199 format on SEPCAM and were afterwards converted to “.mat” format using the custom-made “sep-  
200 cam2mat” MATLAB function for offline analysis. EFRs recorded from the vertex electrode were  
201 re-referenced to the ipsilateral earlobe electrode and filtered between 30 and 1500 Hz using an 800<sup>th</sup>  
202 order Blackman-window based finite-impulse-response (FIR) filter. Epoching was applied to the  
203 steady state part of the response, i.e. 100 to 500 ms of the response relative to the stimulus onset.  
204 The baseline drift was corrected by subtracting the mean of each epoch, afterwards 200 epochs with  
205 the highest peak-to-trough values were rejected. The amplitudes of the remained epochs did not ex-  
206 ceed 100  $\mu V$ . A frequency-domain bootstrapping approach was adopted to estimate the noise-floor  
207 and to remove it from the averaged trials using the method proposed in Zhu et al. (2013). To this  
208 end, we calculated the fast Fourier Transform (FFT) of 800 epochs to generate 400 mean spectra  
209 by randomly sampling the 800 epochs with replacement (keeping an equal number of polarities in  
210 the draw). Averaging the resampled spectra yielded the  $i$ -th mean-EFR spectrum ( $EFR_{raw_i}$ ):

$$EFR_{raw_i} = \frac{2}{n} |X_i|, \quad i = 1, \dots, 400 \quad (2)$$

211 where,  $X_i$  stands for the  $i$ -th averaged resampled spectra and  $n$  is the number of FFT points  
212 ( $n=10000$ ). To calculate the spectral noise-floor, we repeated the resampling procedure 1500 times,  
213 but used phase-flipped odd epochs:

$$NF_j = \frac{2}{n} |Y_j|, \quad j = 1, \dots, 1500 \quad (3)$$

214 In Eq. 3,  $Y_j$  is the  $j$ -th averaged resampled spectra with phase-flipped odd epochs. Lastly, we  
215 subtracted the NF mean ( $\overline{NF}$ ), from each of the 400 bootstrapped mean-EFRs ( $EFR_{raw_i}$ ) to derive

216 400 NF-corrected EFR spectra:

$$\text{EFR}_{\text{Spec}_i} = \text{EFR}_{\text{raw}_i} - \overline{\text{NF}}, \quad i = 1, 2, \dots, 400 \quad (4)$$

217 The peaks of the  $\text{EFR}_{\text{raw}_i}$  at the modulation frequency of stimulus ( $f_1=110$  Hz), and the next  
218 four harmonics were identified if they were above the  $\overline{\text{NF}}$ . We defined the RAM-EFR<sub>i</sub> by sum-  
219 ming the magnitudes of the identified peaks for each  $\text{EFR}_{\text{Spec}_i}$ . The RAM-EFR metric mean and  
220 variability was defined by the mean and standard deviation of RAM-EFR<sub>i</sub> over 400 samples.

## 221 **Auditory Brainstem Responses**

222 ABRs were recorded to 80- $\mu$ s-long alternating polarity clicks presented at 70 and 100 dB-peSPL.  
223 Stimuli were presented through the setup explained in Garrett et al. (2019) and repeated 3000 times  
224 with a rate of 10 Hz using a uniformly distributed random inter-stimulus interval of 100 ms $\pm$ 10 ms.  
225 Cz-channel recordings were re-referenced to the contra-lateral earlobe electrode and filtered between  
226 [100-1500] Hz. 25 ms-long epochs, i.e. -5 to 20-ms relative to the stimulus onset, were extracted and  
227 corresponding mean values were subtracted to perform a baseline correction. Then, each positive  
228 polarity epoch was averaged with the following negative epoch and 100 paired-averages with the  
229 highest peak-to-trough values were rejected. The remaining pair-averaged epochs had amplitudes  
230 below 25  $\mu$ V. To include ABR variability in our analysis and to estimate the ABR noise-floor, we  
231 applied the bootstrapping approach of Zhu et al. (2013), in the time domain. 2000 and 4500 epochs  
232 were drawn for the signal and noise-floor estimation, respectively. Half of the noise-floor-estimation  
233 epochs (i.e. 2250 pair-averaged drawn epochs with replacement) were multiplied by -1 before final  
234 averaging. Finally, the estimated noise-floor mean was subtracted from the 2000 averaged epochs to  
235 yield mean noise-floor-corrected ABR waveforms. ABR wave-I and -V peak and trough amplitudes  
236 and corresponding latencies were determined by visual inspection from the mean ABR waveform

237 and were confirmed by an audiologist. Figure 2 (panels c and d) compares ABR waveforms of a  
238 yNH and oHI subject from the cohort and indicates the identified ABR peaks and latencies. To  
239 extract peak latencies and amplitudes from the bootstrapped data, wave maxima and minima were  
240 detected in 1, 1.8, 0.5 and 1.5 ms intervals around the wave-I<sub>70</sub>, wave-V<sub>70</sub>, wave-I<sub>100</sub>, wave-V<sub>100</sub>  
241 peaks and troughs identified from the mean ABR waveform. The interval ranges were determined  
242 based on visual inspection. ABR wave-I and V latencies were shifted by 1.16 ms to compensate for  
243 the delay introduced by the sound-delivery system.

244 We used a total of 13 ABR and EFR markers in the development phase and one EFR marker in  
245 the validation phase. Table 1 details the definition of each metric and lists the corresponding ab-  
246 breviations used in this paper. The last column defines the variability metric associated with each  
247 marker, which were obtained from the earlier described bootstrapping procedure. To determine  
248 the measurement variability of ABR growth-slopes, we applied error propagation to account for the  
249 standard deviations of two different measures from the same listener, e.g., ABR-70 and ABR-100.  
250 In this case, the bootstrapped metrics were drawn from the 95% confidence interval of a normal  
251 distribution characterized by the mean of the metric and its bootstrapped standard deviation. The  
252 bootstrapping technique described in this section, provided a tool to estimate the variability of  
253 AEP-derived metrics and to incorporate them in the proposed classification approach. Obtained  
254 standard deviations from bootstrapping can be used to measure the CS-profiling prediction robust-  
255 ness of the study participants.

256

## 257 **Individualized Auditory Periphery Model**

258 To simulate individualized SNHL profiles that would match the histopathology of the study par-  
259 ticipants, we used a computational model of the auditory periphery (Verhulst et al., 2018; Osses

260 and Verhulst, 2019). In the first step, we personalized the cochlear model parameters on the basis  
261 of OHC markers of SNHL (audiogram or DPTH). Afterwards, we simulated AEPs for different  
262 degrees of CS and compared the simulations to the recordings to develop and test our auditory  
263 profiling method. Figure 3 schematizes the auditory model individualization.

## 264 Cochlear Model Individualization

265 Measured audiograms and DPTs were used independently to determine the individual CGL pa-  
266 rameters (in dB-HL) of the cochlear transmission-line (TL) model, shown in pink in Fig.3. In our  
267 approach, CGL determines the double-pole of the cochlear admittance through the gain and tuning  
268 of the cochlear filters (Verhulst et al., 2012). We thus model the consequence of OHC-damage or  
269 presbycusis without specifically accounting for damage of the stereocilia or sensory cells.  
270 From here on, mAudTH and sAudTH refer to measured and simulated audiometric thresholds, re-  
271 spectively. Likewise, mDPTH and sDPTH stand for measured and simulated DPOAE thresholds.

### 272 Audiogram-based cochlear filter pole-setting

273 Here, we translated the frequency-specific audiometric dB-HL (Fig. 1a) into cochlear filter gain loss.  
274 These values were translated into double-pole values of the cochlear admittance function across CF  
275 (see Verhulst et al. 2016).

276 Specifically, at a CF corresponding to a measured audiometric frequency ( $CF = f_{\text{aud}}$ ), the power  
277 spectrum of the NH basilar membrane (BM) impulse response,  $H_{\text{NH}}(f_{\text{aud}})$ , served as reference before  
278 the gain loss was applied. Among a range of cochlear filter pole-values in  $[0.036, 0.302]$ , the pole-  
279 value,  $\alpha_A^*(f_{\text{aud}})$ , that causes a relative gain-loss equal to  $\text{mAudTH}(f_{\text{aud}})$ , was assigned. Thereby,  
280 the CGL at  $CF = f_{\text{aud}}$  is given by:

$$\text{CGL}(f_{\text{aud}}) = H_{\text{NH}}(f_{\text{aud}}) - H_{\alpha_{\text{A}}^*}(f_{\text{aud}}) \quad (5)$$

281 where  $H_{\alpha_{\text{A}}^*}(f_{\text{aud}})$  equals the power spectrum of the BM impulse response at  $\text{CF} = f_{\text{aud}}$  with a pole  
 282 value of  $\alpha_{\text{A}}^*$  that causes a CGL equal to  $\text{mAudTH}(f_{\text{aud}})$ . This procedure was repeated for all CF  
 283 channels corresponding to measured audiometric frequencies and individualized cochlear filter pole-  
 284 functions were obtained by interpolating the pole-values across CF (Verhulst et al., 2016).  
 285 We employed the predicted pole functions to simulate individual audiograms and to evaluate the  
 286 prediction error. To this end, individualized AN excitation patterns (ANEP) were simulated in  
 287 response to 500-ms pure-tones presented at audiogram frequencies ( $f_{\text{aud}}$ ) using 62 intensity levels  
 288 (L) between -5 and 55 dB-SPL. We defined ANEP as the RMS of the AN firing rate at each  $\text{CF} \in f_{\text{aud}}$   
 289 and determined on-CF peaks of the presented level series as  $\text{ANEP}_{(f_{\text{aud}},L)}$ . We simulated NH ANEPs  
 290 using NH pole-function at the threshold of audibility in a frequency-specific manner ( $L_{\text{NH}}(f_{\text{aud}})$ ), i.e.  
 291 the zero-phon curve of the equal-loudness-contour (ISO 226:1987). From this reference NH curve,  
 292 we calculated the simulated audiometric thresholds (sAudTH) of the experiment participants as  
 293 follows:

$$L_{\min}(f_{\text{aud}}) = \arg \min_{L \in [-5,55]} [\text{ANEP}_{(f_{\text{aud}},L_{\text{NH}}(f_{\text{aud}}))} - \text{ANEP}_{(f_{\text{aud}},L)}] \quad (6)$$

$$\text{sAudTH}(f_{\text{aud}}) = L_{\min}(f_{\text{aud}}) - L_{\text{NH}}(f_{\text{aud}}) \quad (7)$$

294 Figure 4a shows grand-averaged mAudTHs and sAUDTHs across the yNH, oNH and oHI groups.  
 295 Additionally, Fig. 4c, compares the sAudTH (dashed lines) and mAudTH (solid lines) of an example  
 296 yNH and oHI subject. Note that simulating CGLs greater than 35 dB-HL is impossible in our  
 297 cochlear model, which has a maximal applicable cochlear mechanical gain of 35 dB. In the last  
 298 step, we estimated the absolute prediction error as follows:

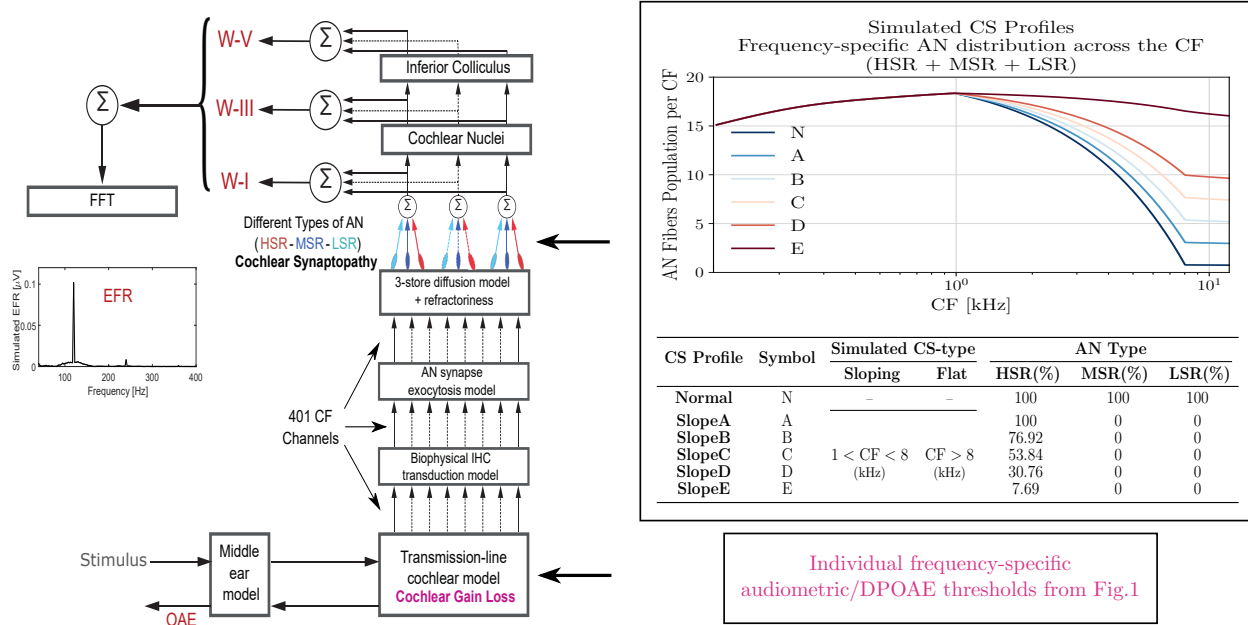

**Figure 3:** Auditory model individualization. The block-diagram on the left depicts the different stages of the employed auditory periphery model (Verhulst et al., 2018). Experimentally measured audiometric thresholds were inserted to the transmission-line cochlear model to adjust BM admittance function poles. The box on top-right corner, shows the non-uniform AN population distribution across the CF for simulated different degrees of CS profiles. The profile without CS is shown in dark brown (indicated with N) and higher degrees of CS are shown according to the color-map.

$$\text{err}_{\text{audio}}(f_{\text{audio}}) = |\text{mAudTH}(f_{\text{aud}}) - \text{sAudTH}(f_{\text{aud}})| \quad (8)$$

299 Figure 4e compares the mean absolute errors on a group-level basis. The elevated error of the  
 300 oHI group at high frequencies is due to the model limitation in simulating gain losses greater than  
 301 35 dB-HL.



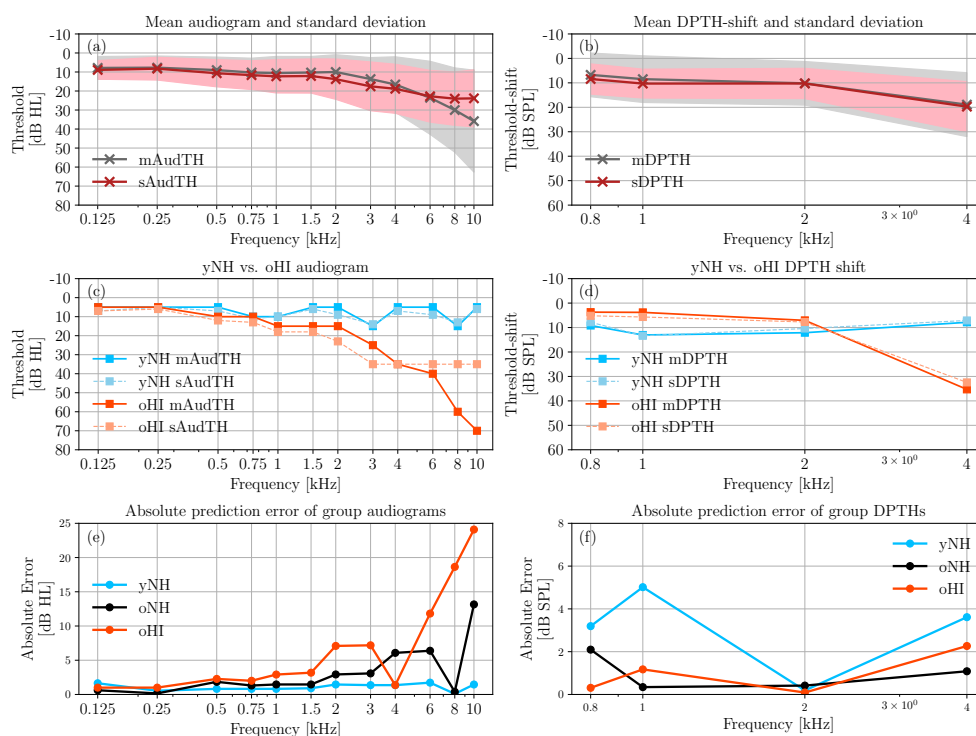

**Figure 4:** A comparison between the measured and simulated AudTHs and DPTHs. The average (solid) and standard deviation (shaded area) of the measured (grey) and simulated (red) AudTHs and DPTHs are shown in panel (a) and (b), respectively. A comparison between sAudTH and mAudTH of a yNH and oHI listener is shown in panel (c). Panel (d) compares the sDPTH (dotted) and mDPTH (solid) of the same yNH and oHI listeners (c). Frequency-specific group-averaged absolute prediction errors of AudTH and DPTH are shown in panels (e) and (f), respectively (yNH: blue, oNH: black, oHI: orange).

### 302 DPTH-based cochlear filter pole-setting

303 Implementing DPTH-based cochlear model individualization was complicated by the fewer DPTHs  
 304 we had available, i.e. four frequencies, compared to 12 AudTHs. Hence, a simple interpolation to  
 305 determine poles between the measured frequencies, yielded large prediction errors. Additionally,  
 306 the longitudinal filter coupling and associated gain propagation along the cochlear partition compli-  
 307 cated matters. To tackle these issues, we trained a machine-learning algorithm to map DPTHs via

308 cochlear travelling waves to corresponding cochlear filter pole functions across CF. Once trained,  
309 we need only a few measured DPTHs to make a relatively accurate prediction of individual pole  
310 values. Figure 5 illustrates the complete procedure.

311 First, we constructed the training data (Fig. 5a) using 26 sets of random cochlear filter pole func-  
312 tions. Each set contained 1001 CF-dependent poles and random pole-values lay between 0.036  
313 and 0.302, covering the pole-values associated with both NH and HI profiles. Additionally, three  
314 reference pole-functions were included as part of the training:  $NH_{poles}$  (NH poles),  $flat_{min}$  with  
315 across-CF poles of 0.036 (maximally intact cochlea) and  $flat_{max}$ , with across-CF poles of 0.302 (35  
316 dB-HL across CF). We employed the generated pole functions and simulated DP amplitudes ( $sL_{DP}$ :  
317 the magnitude of  $2f_1 - f_2$ ) to train the mapping function. The considered  $f_2$  primary frequencies,  
318 i.e. 0.8, 1, 2 and 4 kHz ( $f_1 = f_2/1.2$ ) corresponded to the recordings we had available and  $L_2$  levels  
319 (-10 to 70 dB-SPL, with a step of 5-dB). We simulated DPOAE input-output (I/O) functions at  
320 each  $f_2$  frequency and determined the sDPTH as the  $L_2$  level at which the  $sL_{DP}$  growth function  
321 crossed the  $L_2$  of -10 dB-SPL. We chose a -10 dB-SPL threshold for our simulations, given that the  
322 conventional experimental -25 dB-SPL crossing point yielded inconclusive sDPTH, in particular  
323 for pole values associated with greater CGLs. sDPTH values for 26 sets of pole-functions at four  
324 primary frequencies were fed into the neural network after normalization ( $sDPTH_{norm}$ , Fig. 5b)  
325 to train it to map frequency-specific  $sDPTH_{norm}$  values (input) to CF-dependent pole-functions  
326 (output).

327 The architecture of the designed neural network is shown in Fig. 5b, and consists of an input-layer  
328 of four neurons, two hidden-layers of 150 neurons and an output layer of 1001 neurons. A standard  
329 *sigmoid* activation function (i.e., between 0 and 1), was applied to the hidden layers. A customized  
330 *sigmoid* activation function (between 0.036 to 0.302), was employed in the output layer to yield  
331 the desired range of the cochlear model pole-functions. An ADAM optimizer with a learning rate  
332 of 0.001 was applied to minimize the mean-square-error (MSE) of the learning algorithm. The

333 method was developed in Python using Keras library and Tensorflow back-end.  
334 The trained neural network was employed to predict individualized pole-functions given DPTHs of  
335 the experimental cohort (Fig. 5c). Prior to the prediction, mDPTHs needed to be pre-processed to  
336 determine a suitable experimental range of DPTHs for the mapping. Among the 41 subjects, six  
337 subjects (yNH: three, oNH: two and oHI: one) without complete mDPTH values at all measured  
338 frequencies were dropped. In each of the three recruited groups, the 99% confidence interval around  
339 the frequency-specific group-means were specified and mDPTH values that either exceeded or fell  
340 below of those intervals were set to extremum values. Then, mDPTHs were mapped to the range of  
341 the sDPTH associated with reference  $\text{flat}_{\min}$  ( $\text{sDPTH}_{\text{flat}_{\min}}$ ) and  $\text{flat}_{\max}$  ( $\text{sDPTH}_{\text{flat}_{\max}}$ ) pole func-  
342 tions. Afterwards, mapped mDPTHs ( $\text{mDPTH}_{\text{map}}$ ) were normalized ( $\text{mDPTH}_{\text{norm}}$ ) and given to  
343 the trained neural network to predict personalized pole-functions. To assess the prediction error,  
344 the predicted pole functions ( $\text{Poles}_{\text{pred}}$  in Fig. 5c), were used to simulate individualized sDPTHs  
345 that were compared to the individual mDPTHs  $f_2$  primary frequencies. mDPTHs and sDPTHs  
346 were referenced to the simulated DPTHs of a model with  $\text{NH}_{\text{poles}}$  as follows:

$$\text{sDPTH}_{\text{ref}}(f_2) = \text{sDPTH}(f_2) - \text{sDPTH}_{\text{NH}}(f_2) \quad (9)$$

$$\text{mDPTH}_{\text{ref}}(f_2) = \text{mDPTH}_{\text{map}}(f_2) - \text{sDPTH}_{\text{NH}}(f_2) \quad (10)$$

347  $\text{sDPTH}_{\text{NH}}(f_2)$  refers to the frequency-specific sDPTH values simulated using the model with  
348  $\text{NH}_{\text{poles}}$ . Obtained  $\text{sDPTH}_{\text{ref}}$  and  $\text{mDPTH}_{\text{ref}}$  from Eq. 9 and 10 were mapped back to the experi-  
349 mental range according to Eq. 11 and 12, and corresponding grand-averages and standard deviations  
350 are shown in Fig. 4b. More specifically, Fig. 4c compares measured and simulated DPTH-shifts for  
351 a yNH and oHI subject.

$$\text{sDPTH}_{\text{shift}}(f_2) = \text{sDPTH}_{\text{ref}}(f_2) \frac{\max[\text{mDPTH}(f_2)] - \min[\text{mDPTH}(f_2)]}{\text{sDPTH}_{\text{flat}_{\text{max}}}(f_2) - \text{sDPTH}_{\text{flat}_{\text{min}}}(f_2)} \quad (11)$$

$$\text{mDPTH}_{\text{shift}}(f_2) = \text{mDPTH}_{\text{ref}}(f_2) \frac{\max[\text{mDPTH}(f_2)] - \min[\text{mDPTH}(f_2)]}{\text{sDPTH}_{\text{flat}_{\text{max}}}(f_2) - \text{sDPTH}_{\text{flat}_{\text{min}}}(f_2)} \quad (12)$$

352 Lastly, the prediction error was calculated as in Eq. 13 and the absolute mean error for each  
353 group is shown in Fig 4f.

$$\text{err}_{\text{dpth}}(f_2) = |\text{mDPTH}_{\text{shift}}(f_2) - \text{sDPTH}_{\text{shift}}(f_2)| \quad (13)$$

354 The developed machine-learning approach can be used to personalize cochlear model parameters  
355 based on an objective measure of OHC damage (DPTH) and predict individual CS profiles. CS-  
356 profiling can be compared for either the DPTH or AudTH-based cochlear model individualization  
357 method, and when no DPTHs are available the standard audiogram-based method can be adopted.

## 358 **Simulating Cochlear Synaptopathy Profiles**

359 We employed the AudTH- and DPTH-based individualized CGL models to simulate EFRs and  
360 ABRs for different CS profiles. To introduce CS, the simulated normal-hearing AN fiber popu-  
361 lations, (the  $N$  CS profile in Fig. 3) was reduced in a CF-specific manner. Five additional CS  
362 profiles were simulated by proportionally lowering the number of different AN types, starting from  
363 low- and medium-spontaneous-rate (LSR and MSR) fibers in profile  $A$  to the most severe AN-loss  
364 in  $E$  that only kept 7.69% of the high-spontaneous-rate (HSR) fiber population. The table in  
365 Fig. 3 details the AN fiber numbers and types considered for each of the six simulated CS pro-  
366 files. IHC-related dysfunctions were not considered in this study, given that low degrees of CS do  
367 not cause IHC damage (Kujawa and Liberman, 2009; Furman et al., 2013; Shaheen et al., 2015).

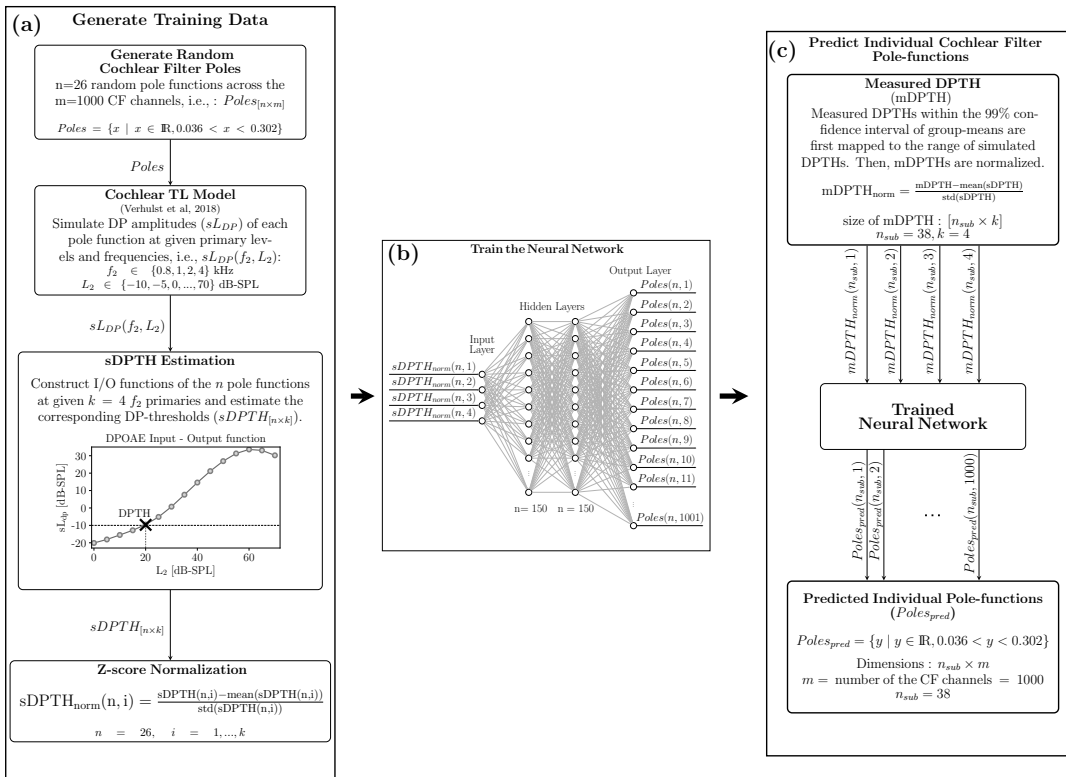

**Figure 5:** Neural network-based cochlear model individualization using measured and simulated DPTHs. (a) Random cochlear filter poles are generated and corresponding DPTHs are simulated using TL model (sDPTH). (b) The normalized sDPTH ( $sDPTH_{norm}$ ) at four frequencies are introduced to the neural-network as input. The random pole values generated in (a) are served as training target for  $sDPTH_{norm}$ . (c) Measured DPTHs (mDPTHs) are fed into the trained neural network after pre-processing and individualized cochlear filter pole-functions are predicted.

368 However, removing all AN fibers from an IHC in the model would functionally correspond to IHC  
 369 damage. The CF dependence of the AN population was considered in two steps: (1) Following  
 370 the CF-dependent AN distribution observed in rhesus monkey (Valero et al., 2017; Keshishzadeh  
 371 et al., 2020), we applied a non-uniform NH AN fiber population. (2) CF-specific AN-damage pro-  
 372 files were simulated. The former was achieved by mapping the counted CF-dependent AN fibers  
 373 population in the rhesus monkey (Valero et al., 2017) to the human cochlea, using a distribution  
 374 of  $N_{HSR} = 68\%$ ,  $N_{MSR} = 16\%$  and  $N_{LSR} = 16\%$  at each CF (Lieberman, 1978). Then, sloping high-

375 frequency AN-fiber loss was applied across CF with the assumption that CS starts from the higher  
376 frequencies first (Wu et al., 2020). We ran EFR/ABR simulations for different AN fiber damage  
377 profiles, which were characterized by a sloping loss of between 1 and 8-kHz. Above 8 kHz, we  
378 applied a frequency-independent loss.

379 For every subject we simulated AEPs for each CS profile, after we personalized the cochlear models  
380 using either the AudTH-or DPTH-based method. The stimuli adopted for these simulations were  
381 identical to those adopted experimentally, but were digitized using a sampling rate of 100 kHz,  
382 rather than 48 kHz. Simulated instantaneous firing rates from the AN, cochlear nucleus (CN) and  
383 IC model stages, namely ABR wave-I, III and V, respectively, were added up to simulate EFRs  
384 (Fig.3). RAM-EFR magnitudes were calculated using Eq. 1.

385 To simulate ABRs, 80- $\mu$ s clicks were presented to the model with a continuous sequence of 50 repe-  
386 titions of alternating polarities (100 in total) and a rate of 10 Hz. Sequential stimulus presentation  
387 was adopted to account for the adaptation properties of AN fibers. Individual ABR wave-I and  
388 V latencies and amplitudes were extracted by averaging the peak-to-trough values of the response  
389 to the last, i.e. 50<sup>th</sup>, positive and negative clicks. The simulated ABR wave-I and V latencies  
390 were respectively shifted by one and three ms to match latencies of recorded ABRs. These values  
391 were determined to match the measured yNH group-mean ABR wave-I and V latencies (at 100  
392 dB-peSPL) with the grand-average individualized ABR simulations across the yNH group. Given  
393 that simulated ABR latencies were not impacted by CS, the applied latency shifts will not confound  
394 the CS prediction.

## 395 Individual Synaptopathy Profile Predictions

396 In previous sections, cochlear model parameters of the subjects were determined using either  
397 AudTH- or DPTH-based methods and 13 personalized AEP-derived metrics were simulated for

398 six CS profiles of each experiment participant. Here, we develop a classification approach, forward-  
399 backward classification, to predict the simulated CS profile that best matches recorded individual  
400 AEP metrics and determine the AEP metric that gives the most accurate segregation of simulated  
401 individualized CS profiles. This step was implemented separately for either of the cochlear individ-  
402 ualization methods. After excluding eight subjects from the cohort (six without complete DPTs  
403 and two with undetectable ABRs), we developed our individual SNHL-profiling method on data  
404 from 35 subjects (yNH: 12, oNH: 12 and oHI: 11).  
405 Before classification, we first normalized the 13 AEP metrics (Table 1) derived from measured (M)  
406 and simulated six CS profiles per individual (S). The normalized S and M were calculated using  
407 Eq. 14 and 15.

$$S_{\text{norm}} = \frac{S - \bar{S}}{\sigma_S} \quad (14)$$

408 S is the matrix of simulated AEP metrics and contains 210 rows (35 subjects with six CS profiles)  
409 and 13 columns, the number of derived AEP metrics.  $\bar{S}$  and  $\sigma_S$  refer to the mean and standard  
410 deviation of S, respectively.

$$M_{\text{norm}} = \frac{M - \bar{M}}{\sigma_M} \quad (15)$$

411 In Eq. 15, M refers to the matrix of measured AEP metrics with a dimension of  $35 \times 13$ . We created  
412 8191 feature-sets using all possible combinations of 13 metrics ( $\sum_{i=1}^{13} \binom{13}{i} = 8191$ ). Metrics combi-  
413 nation was performed separately for  $M_{\text{norm}}$  and  $S_{\text{norm}}$ . The number of metrics in each feature-set  
414 varied between one and 13. From here on,  $\mathbf{F}$  refers to the constructed 8191 feature-sets of AEP-  
415 derived metrics and  $F_i$  with  $i \in \{1, \dots, 13\}$  indicates a subset of  $\mathbf{F}$  that has  $\binom{13}{i}$  feature-sets and  
416 each feature-set contains a combination of  $i$  metrics. In the following paragraphs we explain the  
417 classification approach for an exemplary feature-set,  $f_e$ , selected from  $\mathbf{F}$ . The train and test datasets

418 required for classification were constructed by choosing  $f_e$  of all participants from  $S_{\text{norm}}$  and  $M_{\text{norm}}$   
419 and we called them  $S_{\text{train}}$  and  $M_{\text{test}}$ , respectively. The proposed forward-backward classification  
420 method, comprised of two identical k-nearest-neighbor (kNN: k=1, Euclidean distance) classifiers.  
421 Classifier(1) in forward classification was trained by  $S_{\text{train}}$  in six classes with known class labels from  
422 the model simulations ( $L_S$ ), i.e. the six simulated CS profiles previously described in Fig. 3. Then,  
423 individual CS profiles were predicted by testing the trained classifier with the  $M_{\text{test}}$ . Figure. 6a  
424 visualizes the different steps in forward classification. In this step, the evaluation of classification  
425 performance is unfeasible, since the actual CS degree of experiment participants are unknown. To  
426 address this issue, we interchanged the train-test datasets of the forward classification and imple-  
427 mented a second classification approach, called backward classification to assess the performance  
428 of the classifier(1) based on a second classifier (Fig. 6b). In this regard, we took the output of  
429 forward classification, i.e. the predicted CS degrees of experiment participants ( $L_M$  in Fig. 6),  
430 and corresponding measured AEP metrics ( $M_{\text{test}}$ ) to train the classifier(2) of Fig. 6b. Afterwards,  
431  $S_{\text{train}}$ , with known CS labels ( $L_S$ ) from the simulated individualized CS profiles, was used to test  
432 the trained classifier(2). The vector of predicted CS labels by classifier(2) ( $L_{S_{\text{Pred}}}$ ) was compared  
433 to  $L_S$  and correspondig prediction accuracy was calculated as follows:

$$\text{acc} = \frac{\sum_{q=1}^n [L_S(q) == L_{S_{\text{Pred}}}(q)]}{n} \quad (16)$$

434 where  $n$  is equal to 210 (35 subjects with six CS profiles). Thus, the backward classification offers the  
435 possibility to calculate the accuracy of predicted CS profiles of study participants based on model  
436 simulations. We then repeated the forward-backward classification over all possible combinations of  
437 the derived metrics, i.e. 8191 feature-sets, and calculated the prediction accuracy of each feature-set  
438 according to Eq. 16. In this respect, the backward classification method gives the insight that to  
439 which degree classifier(1) was accurate in predicting CS degrees of experimental participants. Our



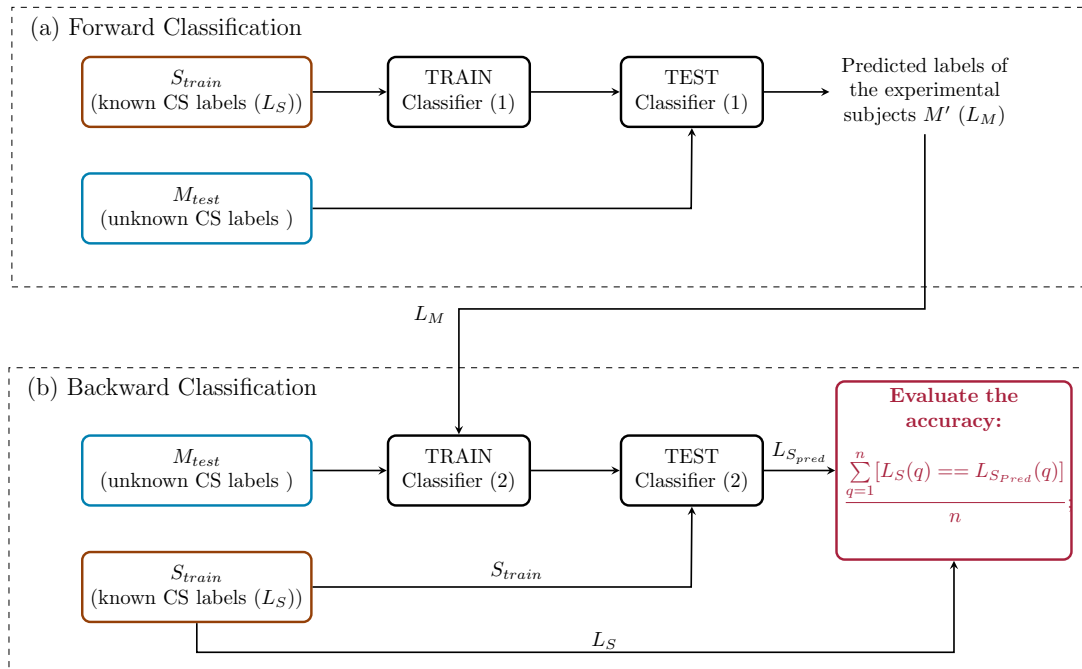

**Figure 6:** The forward-backward classification method. (a) Forward classification: Classifier(1) is trained with individualized simulated AEP-derived metrics ( $S_{train}$ ) for six CS profiles ( $L_S$ ) and tested with measured AEP-derived metrics ( $M_{test}$ ). The predicted labels ( $L_M$ ) for the study participants are entered to block (b). The backward-classification in (b) trains classifier(2) using measured AEP-derived metrics, i.e.,  $M_{test}$ , and labels predicted by the forward classification i.e.,  $L_M$ . Classifier(2) is tested by  $S_{train}$  and corresponding labels ( $L_S$ ) are used to assess the classifier performance.

440 classification approach makes use of combined simulated and recorded data to predict CS-profiles  
 441 and can test the accuracy of these methods, even though a direct and actual validation of the CS  
 442 histopathology still remains hidden due to experimental difficulties.

## 443 Results

444 We applied forward-backward classification for each of the cochlear model individualization methods  
 445 (AudTH and DPTH) and calculated the prediction accuracy of all feature-sets in **F**. For each

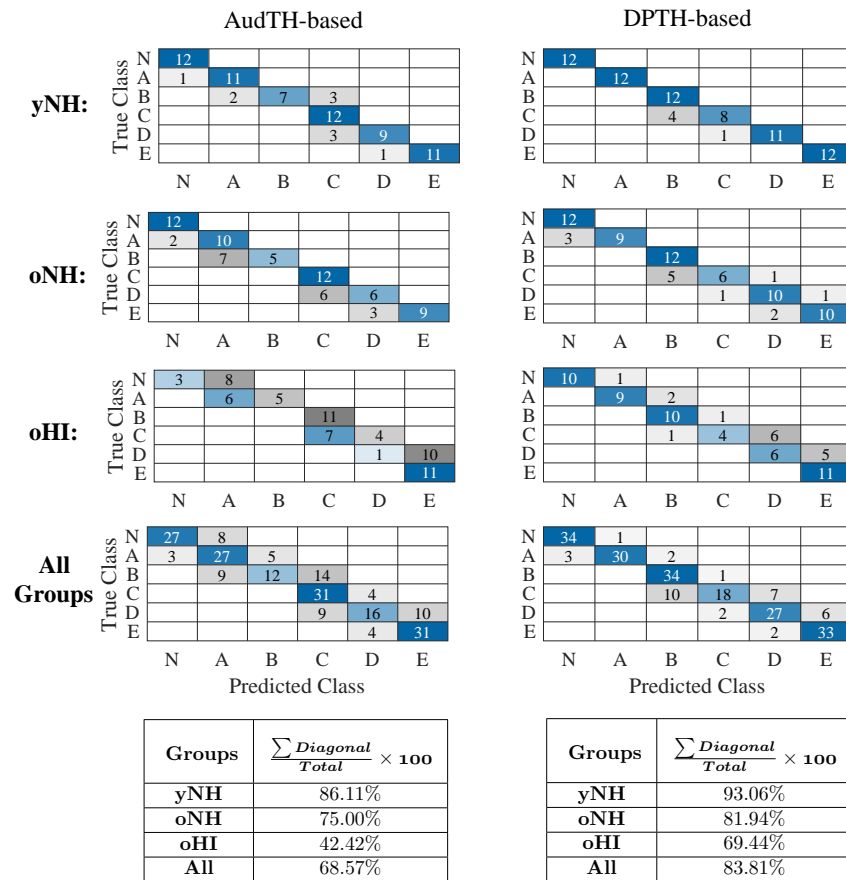

**Figure 7:** Confusion tables at subgroup and group-levels for both AudTH and DPTH-based cochlear model individualization methods. The tables summarize the accuracy of classifier(2) in Fig. 6b for subgroups, as well as all groups together.

446 cochlear profiling method, first, we determined the feature-set in each  $F_i$  ( $i \in \{1, \dots, 13\}$ ), that  
 447 had the highest classification accuracy.  $F_i$  consisted of feature-sets with  $i$  AEP-derived metrics.  
 448 Then, the prediction variability was estimated using forward-backward classification by including  
 449 the standard deviations of selected feature-sets. Lastly, we report individually predicted CS profiles  
 450 belonging to those feature-sets.

## 451 **Combination of AEP-derived Metrics**

452 To determine the best combination of metrics for CS profiling, the forward-backward classification  
453 was performed on the mean AEP-derived metrics of experiment participants and corresponding  
454 classification accuracy was reported as  $\text{acc}_{\text{mean}}$ . Thus, we calculated  $\text{acc}_{\text{mean}}$  values of the predic-  
455 tions for 8191 feature-sets in  $\mathbf{F}$  and determined the feature-set that yielded the highest  $\text{acc}_{\text{mean}}$   
456 among all feature-sets in  $F_i$ , with  $i$  combined metrics ( $i \in \{1, \dots, 13\}$ ). Accordingly, 13 feature-sets  
457 were selected among 8191 in  $\mathbf{F}$ . Table 2 and 3 list those feature-sets and corresponding  $\text{acc}_{\text{mean}}$  val-  
458 ues for AudTH and DPTH-based methods, respectively. The RAM-EFR metric yielded the highest  
459  $\text{acc}_{\text{mean}}$  values for both cochlear model individualization methods. The obtained 83.81%  $\text{acc}_{\text{mean}}$   
460 of DPTH-based method, was higher than that of the AudTH-based method (68.57%), suggesting  
461 that methods which assess OHC damage more directly (i.e. DPTH vs. AudTH) yield a better  
462 classification accuracy in predicting simulated individualized CS profiles.

## 463 **Prediction Variability**

464 The impact of subject-specific factors and measurement noise reflect on inter- and within-subject  
465 variability of the AEP recordings and can have an impact on the accuracy of the classification  
466 method. To measure this effect, the forward-backward classification was repeated, this time by  
467 extracting metrics from the bootstrapped average trials, rather than from the mean of trials. This  
468 resulted in distributions for each specific metric and each subject, with standard deviations as given  
469 by the last column of Table 1. Then, 100 samples were randomly drawn from the distribution of  
470 each metric. Thus, for every feature-set in Table 2 and 3, the corresponding metrics samples were  
471 combined to yield 100 variations of each feature-set. Afterwards, the CS profile prediction was  
472 repeated 100 times with each feature-set for each subject, and prediction accuracy was assessed in  
473 every repetition. Lastly, the standard deviation of the calculated accuracies ( $\text{acc}_{\text{SD}}$ ) was determined

474 over the 100 repetitions of each feature-set and listed in the last column of Table 2 and 3.  
475 For the best predictor metric (RAM-EFR),  $\text{acc}_{\text{SD}}$  values of 2.95% and 2.66% were obtained for  
476 the AudTH- and DPTH-based methods, respectively. The lowest  $\text{acc}_{\text{SD}}$  was obtained when com-  
477 bining the RAM-EFR with the  $w\text{-}V_{\text{lat}100}$  metric in both cochlear model individualization methods  
478 (AudTH: 1.73% and DPTH: 1.34%). However, the respective  $\text{acc}_{\text{mean}}$  values were considerably  
479 lower than those of the RAM-EFR by itself, particularly in DPTH-based method. To assess the  
480 performance of the RAM-EFR based CS profile prediction in sub-groups, we show confusion tables  
481 in Fig. 7 for AudTH- and DPTH-based cochlear model individualization methods. The diagonals  
482 of each table reflect how often the classifier assigned a CS profile ( $L_{\text{SPred}}$ : predicted class) that  
483 matched with that of in simulated individualized CS profiles ( $L_{\text{S}}$ : true class). Off-diagonal values  
484 show the number of instances that  $L_{\text{SPred}}$  and  $L_{\text{S}}$  were not identical. Detailed prediction ac-  
485 curacy values of each sub-group are summarized in the tables in Fig. 7. The highest and lowest  
486 prediction accuracy values relate to the yNH and oHI group, respectively for both AudTH- and  
487 DPTH-based methods. Comparing the cochlear model individualization methods, it is seen that  
488 the DPTH-based approach outperforms the AudTH-based method on both group- and sub-group  
489 levels.

## 490 Cochlear synaptopathy profile prediction based on individualized 491 classifiers

492 Table 4 lists the predicted individual CS profiles from the RAM-EFR metric (best prediction  
493 accuracy) for both AudTH- and DPTH-based cochlear individualization methods. The reported  
494 profiles are the output of the forward classification step, i.e.  $L_{\text{M}}$  shown in Fig. 6. Considering the  
495 AudTH and DPTH columns of Table 4, lower degrees of AN-damage were predicted for the yNH  
496 group than for the oNH and oHI groups. Additionally, the range of predicted CS profiles in the

497 yNH group shows that yNH listeners might also suffer from different degrees of CS. The oHI group,  
498 which was assumed to suffer from mixed OHC-damage and CS pathologies, were predicted to have  
499 the highest degree of CS among the cohort.

500 Thus far, the reported individualized CS profiles for RAM-EFR were predicted by training a single  
501 classifier with simulated individualized CS profiles of the whole experimental cohort. This has  
502 drawbacks for individual profiling in a clinical context, because it would be ideal if the profiling could  
503 be performed using only recordings from the tested individual. Hence, to establish more accurate  
504 predictions of the individual CS degrees, we took one step further and designed individualized  
505 classifiers, which were trained and tested with the RAM-EFR metric of the same listener. If  $RAM_s$   
506 stands for the six simulated CS profiles of a nominal subject and  $RAM_m$  for the measured RAM-EFR  
507 metric, we first normalized  $RAM_s$  and  $RAM_m$  values by the  $\overline{RAM_s}$  and  $\sigma_{RAM_s}$  (mean and standard  
508 deviation of  $RAM_s$ ). Then we trained and tested the classifier, with the same characteristics as  
509 classifier(1) and (2), using normalized  $RAM_s$  and  $RAM_m$  values, respectively. This procedure was  
510 repeated for all listeners in the cohort and for both AudTH and DPTH-based cochlear model  
511 pole-setting methods. The predicted individualized CS profiles were listed in Table 4 (columns:  
512  $AudTH_{ind}$  and  $DPTH_{ind}$ ). Considering either of the AudTH- or DPTH-based methods, designing  
513 individualized classifiers revealed only minor differences in the predicted CS profiles of individual  
514 listeners compared to those predicted by a single classifier trained with simulated individualized  
515 RAM-EFRs. However, the CS profiles reported in  $AudTH_{ind}$  and  $DPTH_{ind}$  columns might be  
516 more reliable than the group-based predictions, since the former were predicted by individualized  
517 classifiers that were trained on the basis of personalized cochlear simulations.

518 To provide a demonstration of the implemented method, and to show to which extent the model  
519 simulations imitate the experimental measurements, we compare simulated and measured AEPs of a  
520 yNH subject in Fig. 8. Panel (a) depicts simulated RAM-EFR spectra for the different considered  
521 CS profiles. Based on the experimental RAM-EFR (panel (d)) and forward classification, we

522 predicted that this subject had a “N” CS profile, i.e., no AN-damage. The CGL parameters of the  
523 individualized model were adjusted based on DPTHs of the same yNH listener. Panels (b) and (c),  
524 depict the simulated personalized ABR waveforms for the predicted “N” CS degree. Experimental  
525 ABR waveforms to 70 and 100 dB-peSPL clicks are shown in panels (e) and (f), respectively. Details  
526 regarding the value of extracted metrics from the measurements and simulations are provided in a  
527 table at the bottom of the Fig. 8. Even though our classifier did not consider ABR metrics, the  
528 applied personalized OHC and AN profiles predicted  $w-I_{lat100}$ ,  $w-I_{70}$ ,  $w-V_{70}$  and  $w-I_{100}$  markers that  
529 fell the standard deviation of the corresponding recorded values. The remaining simulated ABR  
530 metrics, i.e.,  $w-I_{lat70}$ ,  $w-V_{lat100}$  and  $w-V_{100}$ , only minimally deviated from the range of respective  
531 measurements, showing that our method accurately predicts AEP features to stimuli which were  
532 not included in the classifier.

## 533 Method Validation

534 To validate the proposed method and its generalizability to other cohorts and other measure-  
535 ment equipment, we applied the developed classifier in backward classification step to RAM-EFRs  
536 recorded in a second experiment. Figure 9 schematizes the implementation of the validation method.  
537 Considering the different experimental setup and recording location of the second experiment, the  
538 measured RAM-EFRs of both experiments were scaled between zero and one, prior to classification.  
539 Given that only yNH listeners participated in the second experiment, we employed the smallest  
540 RAM-EFR magnitude recorded from oHI listeners (as part of another study) recorded with the  
541 same setup as the second experiment to scale the RAM-EFRs. The scaled RAM-EFRs of the first  
542 experiment were used to train the classifier(1) in Fig. 6 and afterwards, the trained classifier was  
543 tested with the scaled RAM-EFRs of the second experiment. The predicted CS profiles are illus-  
544 trated as a bar-plot in Fig. 9. 84.21% of the 19 yNH participants of the second experiment were

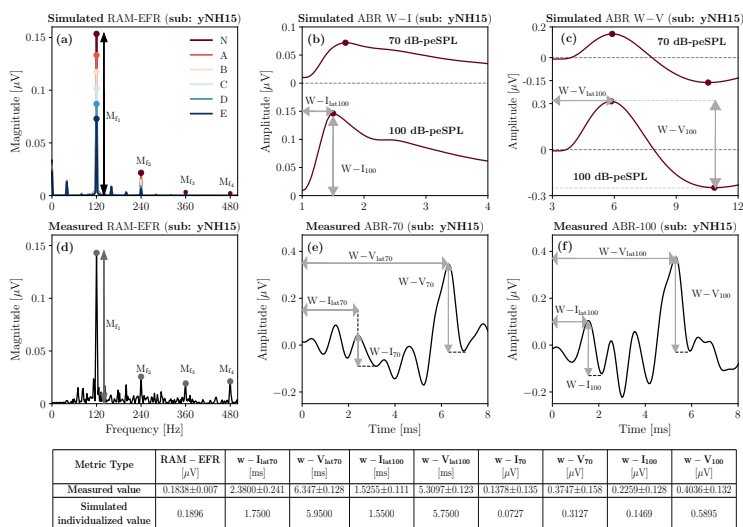

**Figure 8:** A comparison between simulated and measured AEPs for a yNH subject (yNH15). This subject was predicted to have a normal (N) CS profile, i.e., without CS. (a) Simulated RAM-EFR spectra for six CS profiles. The sum of the drawn arrows yields the RAM-EFR magnitude metric. (b) Simulated ABR wave-I to 70 and 100 dB-peSPL clicks. Waveforms were shifted by 1ms to match the experimental data. (c) Simulated ABR wave-V to 70 and 100 dB-peSPL clicks. Waveforms were shifted by 3ms to match the experimental data. The specified arrows in (b) and (c) indicate the extracted metrics. (d) Measured RAM-EFR of the same listener (yNH15). Shown arrows, indicate the peak-to-noisefloor values. Akin to (a), the measured RAM-EFR metric was calculated by summing the of arrow amplitudes. (e) Measured ABR waveform to 70 dB-peSPL clicks. (f) Measured ABR waveform to 100 dB-peSPL clicks. Arrows in (e) and (f), determine the extracted metrics. The shown simulated waveforms were predicted based on the DPTH-based cochlear individualization method. The table shows the exact value of EFR and ABR metrics derived from recordings and predicted CS-profile, “N”, of the same listener.

545 classified as *N*, i.e. without CS, and the rest were predicted to have mild CS. These predictions  
 546 show that a classifier designed on our cohort can be applied to other cohorts to predict individual  
 547 CS degrees based on the RAM-EFR. In line with expectations, the classifier predicted that most  
 548 yNH subjects were synaptopathy free.

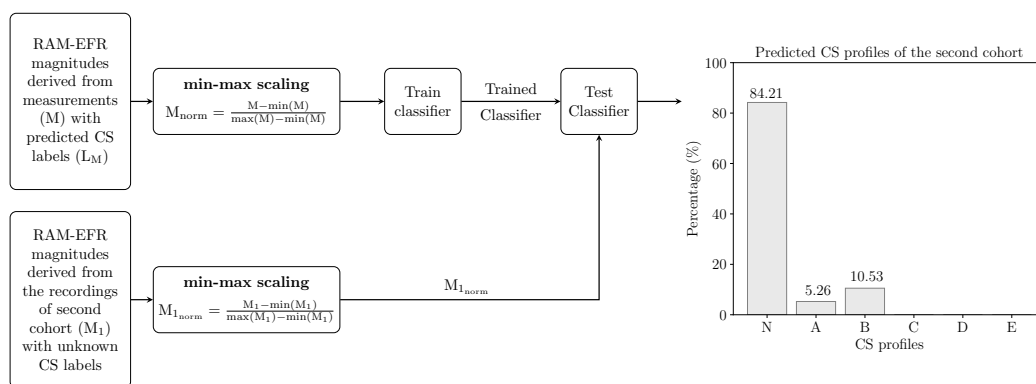

**Figure 9:** Implementation of the validation method. Measured RAM-EFRs (M) with predicted labels in Fig. 6 ( $L_M$ ) are scaled between zero and one to train a kNN classifier. The trained classifier is tested with scaled RAM-EFRs recorded from the second cohort comprised of yNH listeners. The bar-plot shows the predicted CS profiles for the second cohort listeners. The CS profiles labels in the bar-plot are similar to those defined in Fig. 3.

## 549 Discussion

550 By combining experimental ABR and EFR measurements with a modelling approach, we were able  
 551 to develop a classifier that can assign one out of six CS profiles to listeners with mixed SNHL  
 552 pathologies. The classifier considered 8191 feature-sets, of which our forward-backward classifica-  
 553 tion method identified that the RAM-EFR metric yielded the best performance in both AudTH-  
 554 and DPTH-based cochlear individualization methods. We tested both a group and individually  
 555 based method and showed that our method can generalize to other cohorts and measurement se-  
 556 tups. Taken together, we have high hopes that this method can find its way to clinical hearing  
 557 diagnostics, since a single AEP metric is required to yield a CS-profile prediction, given the audio-  
 558 gram or at least four DPTs.



## 559 **Implications for RAM-EFR-based synaptopathy profiling predic-** 560 **tion**

561 On the one hand, predicting the CS degree from AEP metrics is controversial in listeners with  
562 coexisting OHC deficits and on the other, validation of the predicted CS profiles with temporal  
563 bone histology is impossible in humans. Without these means, models of the human auditory  
564 periphery an AEP generators can provide a tool to bridge this experimental gap. The similarity  
565 between predicted AEP degradations for a known CS profile and experimental AEP degradations  
566 can be used to predict the CS profile of individuals. In a previous study, we tested the potential of  
567 the derived-band EFR as a CS predictor in NH listeners using a fuzzy c-means clustering method,  
568 and validated our CS predictions using an another AEP-derived metric (wave-V amplitude growth  
569 slope) recorded from the same listener. We evaluated the method based on the percent of subjects  
570 that were predicted and validated to have the same CS profile, i.e. 61% (Keshishzadeh and Verhulst,  
571 2019). However, the performance of this method is easily impacted by the characteristics of the  
572 adopted predictor and validation metrics, e.g. different generator sources, degree of sensitivity to  
573 subtypes of SNHL and tonotopic susceptibility.

574 The interdisciplinary approach we took in this study tackled this validation issue by proposing  
575 a forward-backward classification approach and applying the trained classifier to AEPs from a  
576 new cohort to test its generalizability. Moreover, we were able to determine the most accurate  
577 AEP-derived metric for CS degree prediction, given a range of 13 possible AEP-derived metrics.  
578 Among the considered AEP-based metrics and combinations thereof, we found that the RAM-EFR  
579 magnitude showed the best performance in segregating simulated individual CS profiles. At the  
580 same time, RAM-EFR metric was involved in all feature-sets that yielded the highest  $acc_{mean}$  among  
581 feature-sets that had equal number of combined metrics (Table 2 and 3). This finding is consistent  
582 with the outcome of Parthasarathy and Kujawa (2018) and Vasilkov et al. (2020), showing that

583 EFRs to SAM or RAM are sensitive to CS. Moreover, the combined modelling and experimental  
584 study of Vasilkov et al. (2020) showed that the adopted RAM-EFR marker (RAM with a 25% duty-  
585 cycle), is minimally impacted by OHC damage. The sharp envelope combined with the long silence  
586 intervals between stimulus peaks generates more synchronized AN fiber responses compared to  
587 conventional SAM stimulus to yield a stronger EFR with extended dynamic range across subjects.  
588 Lastly, the RAM-EFR is a more sensitive marker of CS than ABR (Parthasarathy and Kujawa,  
589 2018). Taken together, our results indicate that the RAM-EFR magnitude is an appropriate AEP-  
590 based metric to predict individual CS degree of listeners in the presence of OHC-loss.

## 591 **The effect of cochlear model individualization method on predicting** 592 **cochlear synaptopathy profiles**

593 In this study, we determined the CGL model parameters using either measured audiometric or  
594 DPOAE thresholds, and assessed the classifier performance of each method in the backward clas-  
595 sification step. Comparing the resulting  $\text{acc}_{\text{mean}}$  values for each cochlear individualization method  
596 can inform which of the two methods yielded the most accurate AEP simulations for a given CS  
597 profile. The  $\text{acc}_{\text{mean}}$  values of RAM-EFR metric showed that setting cochlear filter pole functions on  
598 the basis of measured DPTs outperforms the AudTH method for all experimental groups (Fig. 7,  
599 Tables 2 and 3). This outcome is consistent with literature studies showing that OAEs are a more  
600 sensitive measure of noise-induced cochlear dysfunction in humans (Engdahl et al., 1996; Konopka  
601 et al., 2005; Seixas et al., 2005; Marshall et al., 2009). Moreover, OAEs are not influenced by inner-  
602 hair-cell/AN damage (Trautwein, 2002), whereas behaviourally measured audiometric thresholds,  
603 particularly extended high-frequency thresholds, could be affected by extreme neural degeneration  
604 (Lobarinas et al., 2013; Liberman et al., 2016; Bramhall et al., 2019). Consequently, given the var-  
605 ied susceptibility of AudTHs and DPOAEs to different aspects of SNHL, it was expected that we

606 would obtain non-identical predictions of CS profiles for a nominal subject (Table 4). Comparing  
607 the AudTH and DPTH columns in Table 4, we found a mismatch between individually predicted  
608 CS profiles for 14.28% of subjects (yNH: two, oNH: three). The mismatch degree increased to  
609 20% (yNH: three, oNH: two and oHI: two) when the individual CS profiles were predicted using  
610 personalized classifiers (AudTH<sub>ind</sub> and DPTH<sub>ind</sub> columns).  
611 It is noteworthy that the DPTH-based cochlear individualization was implemented using DPTHS  
612 from only four frequencies (0.8 to 4 kHz), whereas the AudTH-based method considered audiomet-  
613 ric thresholds measured at 12 frequencies (0.125 to 10 kHz). This difference may have resulted in  
614 less accurate CGL model parameters for the DPTH-based method, despite a better performance  
615 of forward-backward classification. In future implementations of this method, we intend to in-  
616 corporate more frequencies in the DPTH measurements, especially at higher frequency regions.  
617 Employing DP-grams instead of DPTHS is another option, as these require a shorter measurement  
618 time. In both cases, we suggest to include lower stimulus levels as well, given that noise-induced  
619 OHC deficits can be identified earlier at lower stimulus levels (Bramhall et al., 2019).

## 620 **Method Limitations**

621 The proposed method for AEP-based CS-profiling, relies on the interactive use of recordings and  
622 model simulations. Hence, shortcomings in either aspect could have caused performance limitations  
623 of the method. The following sections summarize a number of these limitations:

## 624 **Experimental Limitations**

625 (1) ABRs in humans are recorded using vertex electrodes placed on the scalp, which yields smaller  
626 and more variable wave-I amplitudes than when they are recorded in animals using subdermal  
627 electrodes. The measured ABR w-I<sub>70</sub> amplitude in our measurement produced a mean standard

628 deviation of  $0.198\mu V$  across the cohort, which is fairly large with respect to the mean amplitude  
629 of  $0.146\mu V$  (yNH:  $0.1964\pm 0.1436\mu V$ , oNH:  $0.1304\pm 0.203\mu V$ , oHI:  $0.1071\pm 0.243\mu V$ ). Compared to  
630 w-I<sub>70</sub>, w-I<sub>100</sub> amplitudes showed less variability, i.e.,  $0.2503\pm 0.2056\mu V$ . Variability of the w-I<sub>100</sub>  
631 was considerably lower only for yNH group ( $0.350\pm 0.143\mu V$ ). Per subgroup, variability increased  
632 for older groups (oNH:  $0.205\pm 0.247\mu V$ , oHI:  $0.180\pm 0.235\mu V$ ). Given these variabilities, adding  
633 the w-I<sub>100</sub> metric to the second feature-set (RAM-EFR, w-V<sub>lat100</sub>), suddenly increased the acc<sub>SD</sub>  
634 (Tables 2 and 3). (2) Although adopting relative ABR metrics, such as growth functions might  
635 factor out individual differences, the standard deviation of the derived relative metric is influenced  
636 by the propagated error of the absolute metric. (3) ABRs to clicks presented at 100 dB-peSPL  
637 should yield higher wave-I and V amplitudes, than when the stimulus was presented at 80 dB-  
638 peSPL. Nevertheless, the opposite was observed in a few subjects.

## 639 **Model Limitations**

640 (1) The adopted computational model of the auditory periphery allows for OHC deficit simulation  
641 on a CF-dependent basis, but not for CGLs above 35 dB, since the maximum possible BM filter gain  
642 is 35 dB in the model (Verhulst et al., 2018). This constraint led to elevated absolute prediction  
643 errors for high-frequency audiometric thresholds in the oHI (above 4 kHz) and oNH (above 8 kHz)  
644 groups (Fig. 4e). The increased absolute errors were mainly observed for the audiometric threshold  
645 predictions, since DPTHs were only measured for frequencies up to 4 kHz. Thus, the individualized  
646 hard-coded OHC-loss component for the oHI group might lead to similar and less accurate CS  
647 profile prediction for oHI participants with audiometric losses greater than 35 dB-HL. (2) In the  
648 adopted method, we hard-coded the CGL using the individual hearing thresholds and related the  
649 remaining AEP alterations to CS. An alternative way would be to run the model iteratively and  
650 simultaneously optimize both CGL and CS profile parameters on the basis of the experimental data  
651 to obtain the best OHC-loss and CS profiles. However, we did not further explore this route due to

652 the high computational cost of running the adopted TL cochlear model in an iterative optimization  
653 procedure.

## 654 Conclusion

655 In this study, we proposed an integrated modelling and experimental approach to build person-  
656 alized auditory models and predict the AN-damage profile of listeners with mixed SNHL profiles.  
657 To develop individualized cochlear models, we implemented two different methods on the basis of  
658 measured AudTHs and DPTHs. Next, we developed a classification-based approach to predict indi-  
659 vidual CS profiles and determined which AEP metric (or combinations thereof) yielded the highest  
660 prediction accuracy. Afterwards, we evaluated the implemented CGL and CS-profile individualiza-  
661 tion methods on the development dataset, as well as on a new cohort. Our study suggests that  
662 a DPTH-based cochlear model individualization approach combined with a RAM-EFR recording  
663 predicts individual CS profiles most accurately among the 8191 possible combinations of 13 AEP  
664 markers. Additionally, we tested the applicability of the proposed method by applying the trained  
665 classifier to the recorded RAM-EFRs of a new cohort of yNH listeners. The classifier predicted  
666 that these listeners mostly had mild forms of CS, which supports that our method is generalizable  
667 to other recording setups and cohorts. Training the classifier again on larger cohorts may further  
668 increase the generalizability of the method. We hope that this method, or variations thereof, can be  
669 used in a clinical diagnostic context, as the number of needed AEP recordings to yield an individual  
670 CS-profile is small (i.e. 10-15 minutes). Individualized models of SNHL are an important step for  
671 the development of hearing aid algorithms that compensate for both the OHC- and AN-damage  
672 aspects of SNHL.

## 673 Acknowledgement

674 This work was supported by European Research Council (ERC) under the Horizon 2020 Research  
675 and Innovation Programme, grant agreement No. 678120 RobSpear (SK, SV) and DFG Cluster of  
676 Excellence EXC 1077 1 Hearing4all (MG, SV).

## 677 References

- 678 Bharadwaj, H. M. and Shinn-Cunningham, B. G. (2014). Rapid acquisition of auditory subcortical  
679 steady state responses using multichannel recordings. *Clinical Neurophysiology*, 125(9):1878–  
680 1888.
- 681 Bharadwaj, H. M., Verhulst, S., Shaheen, L., Liberman, M. C., and Shinn-Cunningham, B. G.  
682 (2014). Cochlear neuropathy and the coding of supra-threshold sound. *Frontiers in systems*  
683 *neuroscience*, 8:26.
- 684 Boege, P. and Janssen, T. (2002). Pure-tone threshold estimation from extrapolated distortion  
685 product otoacoustic emission i/o-functions in normal and cochlear hearing loss ears. *The Journal*  
686 *of the Acoustical Society of America*, 111(4):1810–1818.
- 687 Bramhall, N., Beach, E. F., Epp, B., Le Prell, C. G., Lopez-Poveda, E. A., Plack, C. J., Schaette,  
688 R., Verhulst, S., and Canlon, B. (2019). The search for noise-induced cochlear synaptopathy in  
689 humans: Mission impossible? *Hearing Research*, 377:88–103.
- 690 Chambers, A. R., Resnik, J., Yuan, Y., Whitton, J. P., Edge, A. S., Liberman, M. C., and Pol-  
691 ley, D. B. (2016). Central gain restores auditory processing following near-complete cochlear  
692 denervation. *Neuron*, 89(4):867–879.

- 693 Chen, G.-D., Tanaka, C., and Henderson, D. (2008). Relation between outer hair cell loss and  
694 hearing loss in rats exposed to styrene. *Hearing research*, 243(1-2):28–34.
- 695 Coats, A. C. and Martin, J. L. (1977). Human auditory nerve action potentials and brain stem  
696 evoked responses: effects of audiogram shape and lesion location. *Archives of otolaryngology*,  
697 103(10):605–622.
- 698 Don, M. and Eggermont, J. (1978). Analysis of the click-evoked brainstem potentials in man using  
699 high-pass noise masking. *The journal of the acoustical society of America*, 63(4):1084–1092.
- 700 Elberling, C. and Parbo, J. (1987). Reference data for ahrs in retrocochlear diagnosis. *Scandinavian*  
701 *Audiology*, 16(1):49–55.
- 702 Engdahl, B., Woxen, O., Arnesen, A. R., and Mair, I. W. (1996). Transient evoked otoacous-  
703 tic emissions as screening for hearing losses at the school for military training. *Scandinavian*  
704 *audiology*, 25(1):71–78.
- 705 Ewert, S. D. and Dau, T. (2000). Characterizing frequency selectivity for envelope fluctuations.  
706 *The Journal of the Acoustical Society of America*, 108(3):1181–1196.
- 707 Ewert, S. D., Kortlang, S., and Hohmann, V. (2013). A model-based hearing aid: Psychoacoustics,  
708 models and algorithms. In *Proceedings of Meetings on Acoustics ICA2013*, volume 19, page  
709 050187. Acoustical Society of America.
- 710 Furman, A. C., Kujawa, S. G., and Liberman, M. C. (2013). Noise-induced cochlear neuropathy is  
711 selective for fibers with low spontaneous rates. *Journal of neurophysiology*, 110(3):577–586.
- 712 Garrett, M., Debener, S., and Verhulst, S. (2019). Acquisition of subcortical auditory potentials  
713 with around-the-ear ceegrid technology in normal and hearing impaired listeners. *Frontiers in*  
714 *neuroscience*, 13:730.

- 715 Garrett, M., Vasilkov, V., Mauermann, M., Wilson, J. L., Henry, K. S., and Verhulst, S. (2020).  
716 Speech-in-noise intelligibility difficulties with age: the role of cochlear synaptopathy. *bioRxiv*.
- 717 Garrett, M. and Verhulst, S. (2019). Applicability of subcortical eeg metrics of synaptopathy to  
718 older listeners with impaired audiograms. *Hearing research*, 380:150–165.
- 719 Goossens, T., Vercammen, C., Wouters, J., and Wieringen, A. v. (2016). Aging affects neural  
720 synchronization to speech-related acoustic modulations. *Frontiers in aging neuroscience*, 8:133.
- 721 Gorga, M. P., Worthington, D. W., Reiland, J. K., Beauchaine, K. A., and Goldgar, D. E. (1985).  
722 Some comparisons between auditory brain stem response thresholds, latencies, and the pure-tone  
723 audiogram. *Ear and Hearing*, 6(2):105–112.
- 724 Gu, J. W., Herrmann, B. S., Levine, R. A., and Melcher, J. R. (2012). Brainstem auditory evoked  
725 potentials suggest a role for the ventral cochlear nucleus in tinnitus. *Journal of the Association  
726 for Research in Otolaryngology*, 13(6):819–833.
- 727 Guest, H., Munro, K. J., Prendergast, G., Millman, R. E., and Plack, C. J. (2018). Impaired speech  
728 perception in noise with a normal audiogram: No evidence for cochlear synaptopathy and no  
729 relation to lifetime noise exposure. *Hearing research*, 364:142–151.
- 730 Heinz, M. G., Zhang, X., Bruce, I. C., and Carney, L. H. (2001). Auditory nerve model for predicting  
731 performance limits of normal and impaired listeners. *Acoustics Research Letters Online*, 2(3):91–  
732 96.
- 733 Henry, K. S. and Abrams, K. S. (2018). Persistent auditory nerve damage following kainic acid ex-  
734 citotoxicity in the budgerigar (*melopsittacus undulatus*). *Journal of the Association for Research  
735 in Otolaryngology*, 19(4):435–449.



- 736 Herdman, A. T. and Stapells, D. R. (2003). Auditory steady-state response thresholds of adults  
737 with sensorineural hearing impairments: Umbrales de las respuestas auditivas de estado estable  
738 en adultos con hipoacusia sensorineural. *International Journal of Audiology*, 42(5):237–248.
- 739 Hickox, A. E., Larsen, E., Heinz, M. G., Shinobu, L., and Whitton, J. P. (2017). Translational  
740 issues in cochlear synaptopathy. *Hearing research*, 349:164–171.
- 741 Hickox, A. E. and Liberman, M. C. (2014). Is noise-induced cochlear neuropathy key to the  
742 generation of hyperacusis or tinnitus? *Journal of neurophysiology*, 111(3):552–564.
- 743 Jepsen, M. L. and Dau, T. (2011). Characterizing auditory processing and perception in individual  
744 listeners with sensorineural hearing loss. *The Journal of the Acoustical Society of America*,  
745 129(1):262–281.
- 746 Jepsen, M. L., Ewert, S. D., and Dau, T. (2008). A computational model of human auditory signal  
747 processing and perception. *The Journal of the Acoustical Society of America*, 124(1):422–438.
- 748 Keshishzadeh, S., Garrett, M., Vasilkov, V., and Verhulst, S. (2020). The derived-band envelope  
749 following response and its sensitivity to sensorineural hearing deficits. *Hearing Research*, page  
750 107979.
- 751 Keshishzadeh, S. and Verhulst, S. (2019). From derived-band envelope-following responses to indi-  
752 vidualized models of near-and supra-threshold hearing deficits. In *Proceedings of the International*  
753 *Symposium on Auditory and Audiological Research*, volume 7, pages 13–20.
- 754 Konopka, W., Pawlaczyk-Luszczynska, M., Sliwinska-Kowalska, M., Grzanka, A., and Zalewski,  
755 P. (2005). Effects of impulse noise on transiently evoked otoacoustic emission in soldiers efec-  
756 tos del ruido impulsivo sobre las emisiones otoacústicas evocadas por transitorios en soldados.  
757 *International Journal of Audiology*, 44(1):3–7.

- 758 Kujawa, S. G. and Liberman, M. C. (2009). Adding insult to injury: cochlear nerve degeneration  
759 after “temporary” noise-induced hearing loss. *Journal of Neuroscience*, 29(45):14077–14085.
- 760 Kummer, P., Janssen, T., and Arnold, W. (1998). The level and growth behavior of the 2 f1-  
761 f2 distortion product otoacoustic emission and its relationship to auditory sensitivity in normal  
762 hearing and cochlear hearing loss. *The Journal of the Acoustical Society of America*, 103(6):3431–  
763 3444.
- 764 Liberman, M. C. (1978). Auditory-nerve response from cats raised in a low-noise chamber. *The*  
765 *Journal of the Acoustical Society of America*, 63(2):442–455.
- 766 Liberman, M. C., Epstein, M. J., Cleveland, S. S., Wang, H., and Maison, S. F. (2016). Toward a  
767 differential diagnosis of hidden hearing loss in humans. *PloS one*, 11(9):e0162726.
- 768 Lobarinas, E., Salvi, R., and Ding, D. (2013). Insensitivity of the audiogram to carboplatin induced  
769 inner hair cell loss in chinchillas. *Hearing research*, 302:113–120.
- 770 Long, G. R., Talmadge, C. L., and Lee, J. (2008). Measuring distortion product otoacoustic emis-  
771 sions using continuously sweeping primaries. *The Journal of the Acoustical Society of America*,  
772 124(3):1613–1626.
- 773 Marshall, L., Lapsley Miller, J. A., Heller, L. M., Wolgemuth, K. S., Hughes, L. M., Smith, S. D.,  
774 and Kopke, R. D. (2009). Detecting incipient inner-ear damage from impulse noise with otoa-  
775 coustic emissions. *The Journal of the Acoustical Society of America*, 125(2):995–1013.
- 776 Mauermann, M. (2013). Improving the usability of the distortion product otoacoustic emissions  
777 (dpoae)-sweep method: An alternative artifact rejection and noise-floor estimation. In *Proceed-*  
778 *ings of Meetings on Acoustics ICA2013*, volume 19, page 050054. Acoustical Society of America.

- 779 Mitchell, C., Phillips, D. S., and Trune, D. R. (1989). Variables affecting the auditory brainstem  
780 response: audiogram, age, gender and head size. *Hearing research*, 40(1-2):75–85.
- 781 Möhrle, D., Ni, K., Varakina, K., Bing, D., Lee, S. C., Zimmermann, U., Knipper, M., and Rüttiger,  
782 L. (2016). Loss of auditory sensitivity from inner hair cell synaptopathy can be centrally com-  
783 pensated in the young but not old brain. *Neurobiology of aging*, 44:173–184.
- 784 Osses, A. and Verhulst, S. (2019). Calibration and reference simulations for the auditory periphery  
785 model of verhulst et al. 2018 version 1.2. *arXiv preprint arXiv:1912.10026*.
- 786 Parthasarathy, A., Bartlett, E. L., and Kujawa, S. G. (2019a). Age-related changes in neural coding  
787 of envelope cues: peripheral declines and central compensation. *Neuroscience*, 407:21–31.
- 788 Parthasarathy, A., Herrmann, B., and Bartlett, E. L. (2019b). Aging alters envelope representations  
789 of speech-like sounds in the inferior colliculus. *Neurobiology of aging*, 73:30–40.
- 790 Parthasarathy, A. and Kujawa, S. G. (2018). Synaptopathy in the aging cochlea: Characteriz-  
791 ing early-neural deficits in auditory temporal envelope processing. *Journal of Neuroscience*,  
792 38(32):7108–7119.
- 793 Plack, C. J., Léger, A., Prendergast, G., Kluk, K., Guest, H., and Munro, K. J. (2016). Toward a  
794 diagnostic test for hidden hearing loss. *Trends in hearing*, 20:2331216516657466.
- 795 Prendergast, G., Tu, W., Guest, H., Millman, R. E., Kluk, K., Couth, S., Munro, K. J., and Plack,  
796 C. J. (2018). Supra-threshold auditory brainstem response amplitudes in humans: Test-retest  
797 reliability, electrode montage and noise exposure. *Hearing research*, 364:38–47.
- 798 Purcell, D. W., John, S. M., Schneider, B. A., and Picton, T. W. (2004). Human temporal auditory  
799 acuity as assessed by envelope following responses. *The Journal of the Acoustical Society of*  
800 *America*, 116(6):3581–3593.

- 801 Rohdenburg, T., Hohmann, V., and Kollmeier, B. (2005). Objective perceptual quality measures  
802 for the evaluation of noise reduction schemes. In *9th international workshop on acoustic echo*  
803 *and noise control*, pages 169–172.
- 804 Schaette, R. and McAlpine, D. (2011). Tinnitus with a normal audiogram: physiological evidence  
805 for hidden hearing loss and computational model. *Journal of Neuroscience*, 31(38):13452–13457.
- 806 Seixas, N., Goldman, B., Sheppard, L., Neitzel, R., Norton, S., and Kujawa, S. (2005). Prospective  
807 noise induced changes to hearing among construction industry apprentices. *Occupational and*  
808 *environmental medicine*, 62(5):309–317.
- 809 Sergeyenko, Y., Lall, K., Liberman, M. C., and Kujawa, S. G. (2013). Age-related cochlear synap-  
810 topathy: an early-onset contributor to auditory functional decline. *Journal of Neuroscience*,  
811 33(34):13686–13694.
- 812 Shaheen, L. A., Valero, M. D., and Liberman, M. C. (2015). Towards a diagnosis of cochlear  
813 neuropathy with envelope following responses. *Journal of the Association for Research in Oto-*  
814 *laryngology*, 16(6):727–745.
- 815 Stamper, G. C. and Johnson, T. A. (2015). Auditory function in normal-hearing, noise-exposed  
816 human ears. *Ear and hearing*, 36(2):172.
- 817 Trautwein, P. (2002). Auditory neuropathy: diagnosis and case management. In *4th ACFOS*  
818 *international conference*, pages 8–10.
- 819 Trune, D. R., Mitchell, C., and Phillips, D. S. (1988). The relative importance of head size, gender  
820 and age on the auditory brainstem response. *Hearing research*, 32(2-3):165–174.
- 821 Valero, M., Burton, J., Hauser, S., Hackett, T., Ramachandran, R., and Liberman, M. (2017).

- 822 Noise-induced cochlear synaptopathy in rhesus monkeys (*macaca mulatta*). *Hearing research*,  
823 353:213–223.
- 824 Vasilkov, V., Garrett, M., Mauermann, M., and Verhulst, S. (2020). Enhancing the sensitivity  
825 of the envelope-following response for cochlear synaptopathy screening in humans: the role of  
826 stimulus envelope. *bioRxiv*.
- 827 Vasilkov, V. and Verhulst, S. (2019). Towards a differential diagnosis of cochlear synaptopathy and  
828 outer-hair-cell deficits in mixed sensorineural hearing loss pathologies. *medRxiv*.
- 829 Verhulst, S., Altoe, A., and Vasilkov, V. (2018). Computational modeling of the human audi-  
830 tory periphery: Auditory-nerve responses, evoked potentials and hearing loss. *Hearing research*,  
831 360:55–75.
- 832 Verhulst, S., Dau, T., and Shera, C. A. (2012). Nonlinear time-domain cochlear model for transient  
833 stimulation and human otoacoustic emission. *The Journal of the Acoustical Society of America*,  
834 132(6):3842–3848.
- 835 Verhulst, S., Jagadeesh, A., Mauermann, M., and Ernst, F. (2016). Individual differences in audi-  
836 tory brainstem response wave characteristics: relations to different aspects of peripheral hearing  
837 loss. *Trends in hearing*, 20:2331216516672186.
- 838 Watson, D. R. (1996). The effects of cochlear hearing loss, age and sex on the auditory brainstem  
839 response. *Audiology*, 35(5):246–258.
- 840 Wu, P.-z., O'Malley, J. T., de Gruttola, V., and Liberman, M. C. (2020). Age-related hearing loss  
841 is dominated by damage to inner ear sensory cells, not the cellular battery that powers them.  
842 *Journal of Neuroscience*, 40(33):6357–6366.

- 843 Zhu, L., Bharadwaj, H., Xia, J., and Shinn-Cunningham, B. (2013). A comparison of spectral  
844 magnitude and phase-locking value analyses of the frequency-following response to complex tones.  
845 *The Journal of the Acoustical Society of America*, 134(1):384–395.
- 846 Zilany, M. S. and Bruce, I. C. (2006). Modeling auditory-nerve responses for high sound pressure  
847 levels in the normal and impaired auditory periphery. *The Journal of the Acoustical Society of*  
848 *America*, 120(3):1446–1466.

## 849 Tables

**Table 1:** Extracted AEP-metrics definitions and corresponding standard deviations. In the last column,  $\sigma$  represents the standard deviation.  $\sigma_{\text{boot}}$  is the standard deviation of the bootstrapped metric.

| Metric                                   | Symbol                     | Definition                                                  | Measure of Variability                                                                          |
|------------------------------------------|----------------------------|-------------------------------------------------------------|-------------------------------------------------------------------------------------------------|
| rectangular-wave amplitude-modulated EFR | RAM-EFR                    | Eq.1                                                        | $\sigma_{\text{boot(RAM-EFR)}}$                                                                 |
| ABR-70 wave-I amplitude                  | w-I <sub>70</sub>          | w-I <sub>70(peak)</sub> - w-I <sub>70(trough-after)</sub>   | $\sigma_{\text{boot(peak-to-trough)}}$                                                          |
| ABR-100 wave-I amplitude                 | w-I <sub>100</sub>         | w-I <sub>100(peak)</sub> - w-I <sub>100(trough-after)</sub> |                                                                                                 |
| ABR-70 wave-V amplitude                  | w-V <sub>70</sub>          | w-V <sub>70(peak)</sub> - w-V <sub>70(trough-after)</sub>   |                                                                                                 |
| ABR-100 wave-V amplitude                 | w-V <sub>100</sub>         | w-V <sub>100(peak)</sub> - w-V <sub>100(trough-after)</sub> |                                                                                                 |
| ABR-70 wave-I latency                    | w-I <sub>lat70</sub>       | w-I <sub>70(peak)</sub> latency                             | $\sigma_{\text{boot(latency)}}$                                                                 |
| ABR-100 wave-I latency                   | w-I <sub>lat100</sub>      | w-I <sub>100(peak)</sub> latency                            |                                                                                                 |
| ABR-70 wave-V latency                    | w-V <sub>lat70</sub>       | w-V <sub>70(peak)</sub> latency                             |                                                                                                 |
| ABR-100 wave-V latency                   | w-V <sub>lat100</sub>      | w-V <sub>100(peak)</sub> latency                            |                                                                                                 |
| ABR wave-I amplitude growth              | w-I-growth                 | $\frac{w-I_{100} - w-I_{70}}{100-70}$                       | $\frac{1}{N} \sqrt{\sigma_{\text{boot}(w-I_{100})}^2 + \sigma_{\text{boot}(w-I_{70})}^2}$       |
| ABR wave-V amplitude growth              | w-V-growth                 | $\frac{w-V_{100} - w-V_{70}}{100-70}$                       | $\frac{1}{N} \sqrt{\sigma_{\text{boot}(w-V_{100})}^2 + \sigma_{\text{boot}(w-V_{70})}^2}$       |
| ABR wave-I latency growth                | w-I <sub>lat</sub> -growth | $\frac{ w-I_{lat100} - w-I_{lat70} }{100-70}$               | $\frac{1}{N} \sqrt{\sigma_{\text{boot}(w-I_{lat100})}^2 + \sigma_{\text{boot}(w-I_{lat70})}^2}$ |
| ABR wave-V latency growth                | w-V <sub>lat</sub> -growth | $\frac{ w-V_{lat100} - w-V_{lat70} }{100-70}$               | $\frac{1}{N} \sqrt{\sigma_{\text{boot}(w-V_{lat100})}^2 + \sigma_{\text{boot}(w-V_{lat70})}^2}$ |

**Table 2:** Combination of metrics with the highest mean accuracy ( $acc_{mean}$ ) values in each  $F_i$ , with  $i$  combined metrics. The standard deviation of obtained accuracies are shown in  $acc_{sd}$  column. The reported results are based on AudTH-based cochlear model individualization method.

| Involved Metrics | Involved Subjects | Best Combination of Metrics                                                                                                                                                                                        | acc (%)      |            |
|------------------|-------------------|--------------------------------------------------------------------------------------------------------------------------------------------------------------------------------------------------------------------|--------------|------------|
|                  |                   |                                                                                                                                                                                                                    | $acc_{mean}$ | $acc_{sd}$ |
| 1                | 35                | RAM-EFR                                                                                                                                                                                                            | 68.57        | 2.95       |
| 2                | 35                | RAM-EFR, w- $V_{lat100}$                                                                                                                                                                                           | 64.76        | 1.73       |
| 3                | 35                | RAM-EFR, w- $I_{lat100}$ , w- $I_{100}$                                                                                                                                                                            | 53.33        | 7.86       |
| 4                | 35                | RAM-EFR, w- $V_{lat100}$ , w- $I_{lat100}$ , w- $I_{100}$                                                                                                                                                          | 51.90        | 9.28       |
| 5                | 35                | RAM-EFR, w- $V_{lat100}$ , w- $I_{lat100}$ , w- $I_{100}$ , w- $V_{70}$                                                                                                                                            | 52.86        | 8.69       |
| 6                | 35                | RAM-EFR, w- $I_{lat100}$ , w- $I_{100}$ , w- $V_{70}$ , w- $I_{70}$ , w- $V$ -growth                                                                                                                               | 51.43        | 6.97       |
| 7                | 35                | RAM-EFR, w- $V_{lat}$ -growth, w- $V$ -growth, w- $V_{lat100}$ , w- $I_{70}$ , w- $V_{70}$ , w- $V_{100}$                                                                                                          | 45.24        | 6.79       |
| 8                | 35                | RAM-EFR, w- $V_{lat}$ -growth, w- $V$ -growth, w- $V_{lat100}$ , w- $V_{lat70}$ , w- $I_{70}$ , w- $V_{70}$ , w- $V_{100}$                                                                                         | 45.24        | 6.59       |
| 9                | 35                | RAM-EFR, w- $V$ -growth, w- $I$ -growth, w- $I_{lat100}$ , w- $V_{lat100}$ , w- $I_{70}$ , w- $V_{70}$ , w- $I_{100}$ , w- $V_{100}$                                                                               | 36.19        | 7.11       |
| 10               | 35                | RAM-EFR, w- $V$ -growth, w- $I$ -growth, w- $V_{lat}$ -growth, w- $V_{lat100}$ , w- $V_{lat70}$ , w- $I_{70}$ , w- $V_{70}$ , w- $I_{100}$ , w- $V_{100}$                                                          | 32.86        | 6.67       |
| 11               | 35                | RAM-EFR, w- $V$ -growth, w- $I$ -growth, w- $V_{lat}$ -growth, w- $I_{lat}$ -growth, w- $V_{lat100}$ , w- $V_{lat70}$ , w- $I_{70}$ , w- $V_{70}$ , w- $I_{100}$ , w- $V_{100}$                                    | 27.62        | 6.49       |
| 12               | 35                | RAM-EFR, w- $V$ -growth, w- $I$ -growth, w- $V_{lat}$ -growth, w- $I_{lat}$ -growth, w- $V_{lat100}$ , w- $V_{lat70}$ , w- $I_{70}$ , w- $V_{70}$ , w- $I_{100}$ , w- $V_{100}$ , w- $I_{lat70}$                   | 18.10        | 6.65       |
| 13               | 35                | RAM-EFR, w- $V$ -growth, w- $I$ -growth, w- $V_{lat}$ -growth, w- $I_{lat}$ -growth, w- $V_{lat100}$ , w- $V_{lat70}$ , w- $I_{70}$ , w- $V_{70}$ , w- $I_{100}$ , w- $V_{100}$ , w- $I_{lat70}$ , w- $I_{lat100}$ | 17.14        | 6.75       |

**Table 3:** Combination of metrics with the highest mean accuracy ( $acc_{mean}$ ) values in each  $F_i$ , with  $i$  combined metrics. The standard deviation of obtained accuracies are shown in  $acc_{sd}$  column. The reported results are based on DPTH-based cochlear model individualization method.

| Involved Metrics | Involved Subjects | Best Combination of Metrics                                                                                                                                                                                        | acc (%)      |            |
|------------------|-------------------|--------------------------------------------------------------------------------------------------------------------------------------------------------------------------------------------------------------------|--------------|------------|
|                  |                   |                                                                                                                                                                                                                    | $acc_{mean}$ | $acc_{sd}$ |
| 1                | 35                | RAM-EFR                                                                                                                                                                                                            | 83.81        | 2.66       |
| 2                | 35                | RAM-EFR, w- $V_{lat100}$                                                                                                                                                                                           | 58.57        | 1.34       |
| 3                | 35                | RAM-EFR, w- $I_{lat100}$ , w- $I_{100}$                                                                                                                                                                            | 54.29        | 8.34       |
| 4                | 35                | RAM-EFR, w- $V_{lat100}$ , w- $I_{lat100}$ , w- $I_{100}$                                                                                                                                                          | 61.90        | 8.22       |
| 5                | 35                | RAM-EFR, w- $V_{lat100}$ , w- $I_{lat100}$ , w- $I_{100}$ , w- $V_{70}$                                                                                                                                            | 58.10        | 8.90       |
| 6                | 35                | RAM-EFR, w- $V_{lat100}$ , w- $I_{lat100}$ , w- $I_{100}$ , w- $V_{70}$ , w- $I$ -growth                                                                                                                           | 48.10        | 7.40       |
| 7                | 35                | RAM-EFR, w- $V_{lat100}$ , w- $I_{lat100}$ , w- $V_{100}$ , w- $V_{70}$ , w- $V$ -growth, w- $I_{70}$                                                                                                              | 40.95        | 6.96       |
| 8                | 35                | RAM-EFR, w- $V_{lat100}$ , w- $I_{lat100}$ , w- $V_{100}$ , w- $V_{70}$ , w- $I$ -growth, w- $I_{70}$ , w- $V_{100}$                                                                                               | 35.71        | 7.12       |
| 9                | 35                | RAM-EFR, w- $I$ -growth, w- $V$ -growth, w- $V_{lat}$ -growth, w- $I_{lat70}$ , w- $I_{70}$ , w- $V_{70}$ , w- $I_{100}$ , w- $V_{100}$                                                                            | 34.29        | 7.30       |
| 10               | 35                | RAM-EFR, w- $I$ -growth, w- $V$ -growth, w- $V_{lat}$ -growth, w- $I_{lat70}$ , w- $V_{lat100}$ , w- $I_{70}$ , w- $I_{100}$ , w- $V_{100}$                                                                        | 29.52        | 6.53       |
| 11               | 35                | RAM-EFR, w- $I$ -growth, w- $V$ -growth, w- $V_{lat}$ -growth, w- $V_{lat70}$ , w- $I_{lat100}$ , w- $V_{lat100}$ , w- $I_{70}$ , w- $I_{100}$ , w- $V_{70}$ , w- $V_{100}$                                        | 17.14        | 6.13       |
| 12               | 35                | RAM-EFR, w- $I$ -growth, w- $V$ -growth, w- $V_{lat}$ -growth, w- $I_{lat}$ -growth, w- $I_{lat70}$ , w- $V_{lat70}$ , w- $V_{lat100}$ , w- $I_{lat100}$ , w- $I_{70}$ , w- $V_{70}$ , w- $I_{100}$                | 16.67        | 2.63       |
| 13               | 35                | RAM-EFR, w- $V$ -growth, w- $I$ -growth, w- $V_{lat}$ -growth, w- $I_{lat}$ -growth, w- $V_{lat100}$ , w- $V_{lat70}$ , w- $I_{70}$ , w- $V_{70}$ , w- $I_{100}$ , w- $V_{100}$ , w- $I_{lat70}$ , w- $I_{lat100}$ | 16.67        | 2.93       |



**Table 4:** Predicted individuals CS profiles obtained from AudTH and DPTH based cochlear individualization methods, based on RAM-EFR metric. Columns AudTH<sub>ind</sub> and DPTH<sub>ind</sub>, list the predicted CS profiles by desinging individualized classifiers based on RAM-EFR metric.

| Group | No. | AudTH | AudTH <sub>ind</sub> | DPTH | DPTH <sub>ind</sub> |   |
|-------|-----|-------|----------------------|------|---------------------|---|
| yNH   | 1   | C     | B                    | B    | B                   |   |
|       | 2   | A     | A                    | A    | B                   |   |
|       | 5   | N     | N                    | N    | N                   |   |
|       | 7   | N     | N                    | N    | N                   |   |
|       | 8   | N     | N                    | N    | N                   |   |
|       | 9   | N     | N                    | N    | N                   |   |
|       | 10  | N     | N                    | N    | A                   |   |
|       | 11  | A     | B                    | B    | B                   |   |
|       | 12  | N     | N                    | N    | A                   |   |
|       | 13  | A     | A                    | A    | A                   |   |
|       | 14  | N     | N                    | N    | N                   |   |
|       | 15  | N     | N                    | N    | N                   |   |
|       | oNH | 1     | D                    | D    | C                   | D |
|       |     | 3     | E                    | E    | E                   | E |
|       |     | 4     | D                    | E    | D                   | D |
| 6     |     | D     | D                    | D    | D                   |   |
| 7     |     | C     | D                    | D    | D                   |   |
| 8     |     | E     | E                    | E    | E                   |   |
| 9     |     | N     | A                    | N    | A                   |   |
| 10    |     | B     | B                    | B    | B                   |   |
| 11    |     | C     | D                    | D    | D                   |   |
| 12    |     | N     | N                    | N    | N                   |   |
| 13    |     | E     | E                    | E    | E                   |   |
| 14    |     | C     | D                    | C    | C                   |   |
| oHI   |     | 1     | E                    | E    | E                   | E |
|       |     | 2     | E                    | D    | E                   | D |
|       | 3   | E     | E                    | E    | E                   |   |
|       | 4   | E     | E                    | E    | E                   |   |
|       | 5   | E     | D                    | E    | E                   |   |
|       | 7   | E     | D                    | E    | E                   |   |
|       | 8   | E     | E                    | E    | E                   |   |
|       | 9   | E     | E                    | E    | E                   |   |
|       | 10  | E     | E                    | E    | E                   |   |
|       | 11  | E     | E                    | E    | E                   |   |
|       | 12  | E     | E                    | E    | E                   |   |
